# Supplementary material for: Invasive breast cancer and breast cancer mortality after ductal carcinoma in situ in women attending for breast screening in England, 1988-2014: population based observational cohort study
Source: PubMed Central journal article supplement (PMC7251423; doi:10.1136/bmj.m1570), 2020-05-27
Supplement: mang051452.ww1.pdf [file mang051452.ww1.pdf]

**Invasive breast cancer and breast cancer mortality after ductal carcinoma in situ in women attending for breast screening in England, 1988-2014: population based observational cohort study**

**Supplementary Material**

## Contents

**Supplementary Text, Tables and Figures are listed in the order they are referred to in the paper**

|                                                                                                                                                                                                                                                                          | <b>Page</b> |
|--------------------------------------------------------------------------------------------------------------------------------------------------------------------------------------------------------------------------------------------------------------------------|-------------|
| <b>Supplementary Text S1. Statistical methods</b>                                                                                                                                                                                                                        | 5           |
| <b>Supplementary Table S1. Missing values in the characteristics of 29,044 women in England diagnosed with DCIS as a result of screening between April 2000 and March 2014.</b>                                                                                          | 10          |
| <b>Supplementary Table S2. Numbers of women according to number of characteristics missing among the 29,044 women in England diagnosed with DCIS as a result of screening between April 2000 and March 2014.</b>                                                         | 11          |
| <b>Supplementary Table S3. Person-years at risk and numbers of observed and expected deaths from all causes by age at DCIS diagnosis and time since DCIS diagnosis in 35,024 women with DCIS detected as a result of screening between January 1988 and March 2014.</b>  | 12          |
| <b>Supplementary Table S4. Numbers of observed and expected deaths from all causes by calendar period of DCIS diagnosis and time since DCIS diagnosis in 35,024 women with DCIS detected as a result of screening between January 1988 and March 2014.</b>               | 13          |
| <b>Supplementary Table S5. Person-years at risk and numbers of observed and expected invasive breast cancers by age at DCIS diagnosis and time since DCIS diagnosis in 35,024 women with DCIS detected as a result of screening between January 1988 and March 2014.</b> | 14          |
| <b>Supplementary Table S6. Numbers of observed and expected invasive breast cancers by calendar period of DCIS diagnosis and time since DCIS diagnosis in 35,024 women with DCIS detected as a result of screening between January 1988 and March 2014.</b>              | 15          |

|                                                                                                                                                                                                                                                                                                                   |    |
|-------------------------------------------------------------------------------------------------------------------------------------------------------------------------------------------------------------------------------------------------------------------------------------------------------------------|----|
| <b>Supplementary Table S7. Numbers of person-years at risk, numbers of observed and expected invasive breast cancers, and cumulative risks by date of DCIS diagnosis and time since DCIS diagnosis in 35,024 women with DCIS detected as a result of screening between January 1988 and March 2014.</b>           | 16 |
| <b>Supplementary Table S8. Person-years at risk and numbers of observed and expected invasive breast cancers by surgery, whether both breasts were affected and time since diagnosis in 30,559 women with DCIS detected as a result of screening between April 2000 and March 2014.</b>                           | 17 |
| <b>Supplementary Table S9. Person-years at risk and numbers of observed and expected breast cancer deaths by age at DCIS diagnosis and time since DCIS diagnosis in 35,024 women with DCIS detected as a result of screening between January 1988 and March 2014.</b>                                             | 18 |
| <b>Supplementary Table S10. Numbers of observed and expected breast cancer deaths by calendar period of DCIS diagnosis and time since DCIS diagnosis in 35,024 women with DCIS detected as a result of screening between January 1988 and March 2014.</b>                                                         | 18 |
| <b>Supplementary Table S11. Numbers of person-years at risk, numbers of observed and expected breast cancer deaths, and cumulative risks by date of DCIS diagnosis and time since DCIS diagnosis in 35,024 women with DCIS detected as a result of screening between January 1988 and March 2014.</b>             | 19 |
| <b>Supplementary Table S12. Person-years at risk and numbers of observed and expected breast cancer deaths by surgery, whether both breasts were affected and time since diagnosis in 30,559 women with DCIS detected as a result of screening between April 2000 and March 2014.</b>                             | 20 |
| <b>Supplementary Table S13. Characteristics and vital status on 31 December 2014 of 24,779 women diagnosed with unilateral DCIS detected as a result of screening between April 2000 and March 2014 and who received surgery.</b>                                                                                 | 21 |
| <b>Supplementary Figure S1. Incidence of ipsilateral invasive breast cancer according to various factors in 24,779 women diagnosed with unilateral DCIS as a result of screening between April 2000 and March 2014 and who received surgery showing final margin distances of 1 and 2 mm separately.</b>          | 22 |
| <b>Supplementary Figure S2. Incidence of ipsilateral invasive breast cancer according to various factors in 24,779 women diagnosed with unilateral DCIS detected as a result of screening between April 2000 and March 2014 and who received surgery.</b>                                                         | 23 |
| <b>Supplementary Figure S3. Incidence of ipsilateral invasive breast cancer according to various factors in 24,779 women diagnosed with unilateral DCIS detected as a result of screening between April 2000 and March 2014 and who received surgery showing final margin distances of 1 and 2 mm separately.</b> | 24 |
| <b>Supplementary Table S14. Tests for interactions between pairs of factors for analysis shown in Figure 3.</b>                                                                                                                                                                                                   | 25 |

|                                                                                                                                                                                                                                                                                                                                                                               |           |
|-------------------------------------------------------------------------------------------------------------------------------------------------------------------------------------------------------------------------------------------------------------------------------------------------------------------------------------------------------------------------------|-----------|
| <b>Supplementary Figure S4. Cumulative incidence rate of ipsilateral invasive breast cancer in 24,779 women diagnosed with unilateral DCIS detected as a result of screening between April 2000 and March 2014 by treatment and DCIS grade.</b>                                                                                                                               | <b>26</b> |
| <b>Supplementary Figure S5. Annual incidence rate of ipsilateral invasive breast cancer in 24,779 women diagnosed with unilateral DCIS detected as a result of screening between April 2000 and March 2014 and who received surgery by treatment and age at diagnosis of DCIS.</b>                                                                                            | <b>27</b> |
| <b>Supplementary Figure S6. Incidence rate of contralateral invasive breast cancer according to various factors in 24,779 women diagnosed with unilateral DCIS detected as a result of screening between April 2000 and March 2014 and who received surgery.</b>                                                                                                              | <b>28</b> |
| <b>Supplementary Figure S7. Comparison of the rates of ipsilateral and contralateral invasive breast cancer according to various factors in 24,779 women with unilateral screen-detected DCIS detected as a result of screening between April 2000 and March 2014 and who received surgery.</b>                                                                               | <b>29</b> |
| <b>Supplementary Table S15. Characteristics of 29,044 women diagnosed with unilateral DCIS detected as a result of screening between April 2000 and March 2014 and who received surgery, according to oestrogen-receptor status and whether or not they were recorded as having received endocrine therapy.</b>                                                               | <b>30</b> |
| <b>Supplementary Figure S8. Incidence of ipsilateral and contralateral invasive breast cancer in 29,044 women with unilateral screen-detected DCIS according to oestrogen-receptor status and endocrine therapy.</b>                                                                                                                                                          | <b>31</b> |
| <b>Supplementary Figure S9. Incidence of ipsilateral and contralateral invasive breast cancer in 29,044 women with unilateral screen-detected DCIS who underwent surgery according to oestrogen-receptor status, endocrine therapy, and whether they received mastectomy, breast conserving surgery with radiotherapy, or breast conserving surgery without radiotherapy.</b> | <b>32</b> |

## Supplementary Text S1. Statistical Methods

### **A Tabulation of person-years at risk and observed events**

The analyses were conducted using the standard epidemiological approach of considering the length of time during which a woman was at risk of experiencing an event of interest (invasive breast cancer, invasive ipsilateral breast cancer, invasive contralateral breast cancer, breast cancer death, or death from any cause). The methods described here are for invasive breast cancer (IBC). The methods for the other endpoints are similar.

For each woman who was eligible for the study, the length of time from 6 months after her DCIS diagnosis until the earliest of IBC diagnosis, death, emigration, or 31st December 2014 was calculated. These lengths of time were added together and formed the person-years at risk. These were assumed fixed in the analyses. The number of women whose contribution to the person-years was terminated by an IBC occurring was also obtained. For each analysis both the person-years and the number of IBCs were then tabulated according to the factors needed for that particular analysis.

### **B Observed and expected rates and ratios of observed to expected rates (Supplementary Tables S3- S12, Supplementary Figure S5)**

Observed rates per 1000 person-years were calculated by tabulating the IBCs and the person-years according to categories of the factor of interest (e.g. Age at DCIS diagnosis or Time since DCIS diagnosis) and then for each category dividing the number of IBCs by the number of person-years and multiplying by 1000. The categories for age at DCIS diagnosis were chosen by subdividing the women into 4 groups of approximately equal size whilst remaining close to the age-boundaries used in the screening program while the categories of time since diagnosis were chosen after tabulating the rates in finer time categories to ensure that no features of the data would be concealed by the categorisation. Confidence intervals for observed rates were calculated by assuming that the numbers of IBCs in each category had a Poisson distribution.

Calculation of the numbers of IBCs expected in the study population were based on IBC incidence rates for women in the entire population of England and Wales in five-year groups of attained age for each individual calendar year from 1988-2014. These were provided by Public Health England. The person-years for the study population were then tabulated by these same categories (i.e. five-year groups of attained age within each individual calendar year) as well as for the factors of interest for each specific analysis (e.g. Age at DCIS diagnosis, Time since DCIS diagnosis, Calendar year of DCIS diagnosis). Within each combination of all the tabulated factors, the number of person-years was then multiplied by the relevant attained-age and calendar year specific IBC incidence rate for England and Wales. This provided the number of IBCs expected for that combination of factors. The expected IBCs were then summed over all the factors that were not of direct interest in that analysis (e.g. in Supplementary Table S5 attained age, calendar year of DCIS diagnosis and either Age at DCIS diagnosis or Time since DCIS diagnosis) to provide the number of IBCs expected subdivided by categories of the factor(s) that were of interest in the analysis. For each of these categories, the ratio of observed to expected IBCs (sometimes referred to as the Standardised Incidence Ratio) was then calculated by dividing the number of IBCs observed by the number expected. The confidence intervals for the ratios of observed to expected IBCs were calculated assuming that the number of IBCs observed had a Poisson distribution while the number expected was fixed.

*continued overleaf*

**C Cumulative observed risk of IBC, accounting for competing risks from causes of death other than breast cancer (Figure 2, Supplementary Tables S7 & S11)**

To derive the cumulative risk that a woman in the study population would develop IBC at 1, 2, 3, ..., 18, 19, 20 years after her diagnosis of DCIS, it is necessary to take into account the fact that she may, during this period, die from a cause other than breast cancer before any IBC has had time to develop, thereby reducing the risk that she will develop IBC compared with that suggested just by consideration of the age-specific IBC. The calculation was carried out as follows.

First we divided the time since diagnosis of DCIS into time intervals. The first time interval was of length six months (to account for the fact that women entered the study six months after their diagnosis of DCIS) and subsequent time intervals had length one year. We denote the annual IBC rate (i.e. the observed number of IBCs divided by the person-years) during the  $t^{\text{th}}$  interval by  $r_{\text{ibc},t}$  and the annual competing cause death (CCD) rate during the  $t^{\text{th}}$  interval by  $r_{\text{ccd},t}$ .

Based on the standard theory of Poisson processes, the probability that a woman who has survived up to the beginning of time interval  $t$  without developing IBC will develop IBC during interval  $t$  is:

$$p_{\text{ibc},t} = 1 - \exp[-r_{\text{ibc},t} T_t], \quad (1)$$

where  $T_t$  is the length of time interval  $t$  in years, while the probability that a woman who has survived up to the beginning of time interval  $t$  will die from a CCD during interval  $t$  is:

$$p_{\text{ccd},t} = 1 - \exp[-r_{\text{ccd},t} T_t],$$

and the probability that a woman who has survived up to the beginning of time interval  $t$  without developing IBC will either develop IBC or die from a CCD during interval  $t$  is:

$$p_{\text{ibc+ccd},t} = 1 - \exp[-(r_{\text{ibc},t} + r_{\text{ccd},t})T_t],$$

and the probability that she will experience neither event during interval  $t$  is:

$$1 - p_{\text{ibc+ccd},t}.$$

The probability that a woman will survive up to the end of interval  $(t-1)$  without developing IBC can then be calculated recursively by the formula:

$$Q_{\text{ibc+ccd},t-1} = Q_{\text{ibc+ccd},t-2} (1 - p_{\text{ibc+ccd},t-1}), \quad (2)$$

where  $Q_{\text{ibc+ccd},0}$  is set to 1.

It then follows that, by combining (1) and (2) above, the probability that a woman will develop an IBC during interval  $t$ , accounting for the competing risk of dying previously from another cause is:

$$Q_{\text{ibc+ccd},t-1} [1 - \exp(-r_{\text{ibc},t} T_t)]. \quad (3)$$

For each interval,  $t$ , the quantities in (3) can then be summed over previous time intervals to obtain the cumulative probability of developing an IBC by the end of interval  $t$ . This value can then be multiplied by 100 to provide the corresponding risk in terms of percent. The confidence intervals for the cumulative observed risk of IBC were calculated assuming that the number of IBCs observed had a Poisson distribution.

*continued overleaf*

**D Cumulative expected risk of IBC, accounting for competing risks from causes of death other than breast cancer (Figure 2, Supplementary Tables S7 & S11)**

The calculation of the cumulative expected risk accounting for competing risks from causes of death other than breast cancer was calculated in a similar fashion to that for the observed risk derived above, except that rather than using the observed annual IBC rate (i.e. the observed number of IBCs divided by the person-years) we used the expected rates (i.e. the expected number of IBCs divided by the person-years) where the expected number of IBCs had been calculated as described above in the section ‘Calculation of numbers of IBCs expected’.

**E Comparability between results for women diagnosed with DCIS in different calendar years (Figure 2, Supplementary Tables S7 & S11)**

Death rates in women in the general population have changed during the period in which the National Health Service Breast Screening Programme (NHSBSP) has been in operation and we wished to find a way of examining whether the cumulative risk of developing breast cancer following a diagnosis of screen-detected DCIS had changed that took account of competing causes of death but was not heavily influenced by changes over calendar period in the age-specific death rates from causes other than breast cancer during the study period. Therefore, rather than using individual calendar-year specific values for the CCD rates, we instead used the 2014 death rates for all causes other than breast cancer for England and Wales to account for competing causes of death throughout. This enabled us to be sure that any changes in the cumulative risks of IBC for women diagnosed with DCIS in different calendar years would be attributable to changes in the rate of development of IBC rather than changes in the death rate over calendar time, whilst still taking account of deaths from competing causes.

**F Multiple imputation for missing data on some characteristics (Figures 3-6, Supplementary Figures S1-S9, Supplementary Tables S13-S15)**

Information was available for all the women in the study for dates of screening and DCIS diagnosis, age at DCIS diagnosis, region of residence and treatment, together with dates of emigration, IBC, or death, if any of these occurred before the end of follow-up. For 9,537 of the 29,044 (32.8%) of the women diagnosed between April 2000 and March 2014, information was also available on all the remaining characteristics (DCIS size, DCIS grade, oestrogen-receptor (ER) status, final margin distance and laterality). However, for 50.1%, 14.1%, 2.6%, and 0.4% of women respectively information was missing on 1, 2, 3 or 4 of these characteristics (Tables S1 and S2).

For analyses requiring adjustments, in order to be able to include all the women in every analysis in an appropriate way, irrespective of whether data on some characteristics were missing, the method of multiple imputation was used (Rubin DB, 1987; van Buuren S, 2018). In this method, multiple datasets are created in which the missing values are replaced by imputed (i.e. predicted) values that have been sampled from their predictive distributions. Hence, as well as providing estimates, the method is able to take into account the uncertainty arising from the imputed values as well as the uncertainty in the estimates in any ensuing confidence intervals and significance tests.

All the variables for which any values were missing were categorical and there were no complex design features in the data. For each missing value, its predictive distribution was obtained using chained multinomial logistic regressions for the variables for which some values were missing, starting with the variable for which there were fewest missing values. Additional independent variables in the predictions were year of DCIS diagnosis, age at DCIS diagnosis, region, treatment, invasive breast cancer, and death from breast cancer.

*continued overleaf*

Calculations involving multiple imputation were carried out using the multiple imputation suite of programs in Stata [StataCorp]. The default burn-in period was 10 iterations and, to confirm that this number was sufficient, trace plots for a burn-in period of 100 iterations were produced and examined. To examine the plausibility of the imputed values, the distributions of the imputed and recorded values for each variable were compared and in every case good agreement was found. Results presented in the paper are based on a total of 60 imputed datasets. This number was chosen because the largest percentage missing for any variable was 53.3%, for ER-status.

For the variables where imputation was necessary, the numbers of women given in each category in the tables in this report are the numbers of women averaged over the imputed datasets. For analyses requiring adjustments, each analysis was carried out separately on every imputed dataset, as described in sections **G**, **H**, and **I**, below. The resulting estimates and their variances were then combined via Rubin's rules [Rubin, 1987].

Every analysis involving multiple imputation was also carried out on the original dataset with any missing values assigned to a separate category, rather than imputed. In every case, the results from the two different approaches were virtually identical.

### **G Variation in incidence of ipsilateral IBC rate (or the BCD rate) with patient and tumour characteristics and treatment (Figure 3, Supplementary Figures S1-S3 & S6-S9)**

The extent to which the incidence of ipsilateral IBC (iIBC) varied with the patient and tumour characteristics and the treatment given (e.g. Figure 3) was studied using Poisson regression. To do this both the numbers of iIBCs and the relevant person-years were tabulated according to all the factors shown in Figure 3, and for each factor the categories shown in that figure were used. The boundaries of these categories were chosen by tabulating each variable individually to have as many categories as needed in order to preserve the features of the data whilst avoiding categories with very little data. The numbers of iIBCs in each cell of the table were assumed to have a Poisson distribution and, to study the variation in one particular characteristic, the number of iIBCs expected in the  $j$ th cell of the table were assumed to be given by:

$$\exp(y_j + \mu + \beta_1 x_{1j} + \beta_2 x_{2j} + \dots + \beta_k x_{kj}) \quad (4)$$

where  $y_j$  is the number of person-years in the cell,  $\mu$  is an unknown constant common to all cells,  $x_1, x_2, \dots, x_k$  are indicator variables denoting the different categories of the factor under study,  $\beta_1$  is assumed to be 0 (i.e. setting the first category of the factor as the baseline category), and  $\beta_2, \dots, \beta_k$  are unknown parameters. Models of this form were fitted to the data by the method of maximum likelihood and the results are shown in the left-hand panel of Figure 3, where the values displayed are the estimates of the  $\exp(\beta_i)$  (which correspond to rate ratios) with confidence intervals estimated by the standard errors of the  $\exp(\beta_i)$ . The models in the right-hand side of Figure 3 were similar, but in this case additional terms representing all the other factors shown in Figure 3 (apart from final margin distance, where information was available only from 2007 onwards) were also included in the model.

*continued overleaf*



## **H Significance tests for heterogeneity or trend in the rate ratios for different levels of a factor and in interactions between two factors (Figure 3, Supplementary Figures S1-S3, Supplementary Table 12 , Supplementary Figures S6-S9)**

Significance tests for heterogeneity between the rate ratios for the different levels of a factor were based on models of the form (4) in the previous section. For analyses involving multiple imputation they were carried out using the Wald test and assuming that the between-imputation variance was proportional to the within-imputation variance, while for other analyses they used the likelihood ratio. Where the rate ratio involved the number of IBCs expected from national cancer incidence rates, rather than the number of IBCs in the baseline category,  $y_j$  was replaced by the number of IBCs expected in cell  $j$ . Where there was a natural ordering to the factor of interest, then for the significance test the indicator variables in (4) above were replaced by a variable that took values 1, 2, 3, ...,  $k$  over the different levels of the factor. Significance tests for interactions between the different factors (see Supplementary Table S14) were carried out in a similar fashion with inclusion of terms for the interaction between two variables in models of the form (4) above.

## **I Cumulative rates (Figures 4, 5, Supplementary Figure 4)**

To obtain cumulative rates, the person-years and IBCs were tabulated simultaneously according to categories of time since DCIS diagnosis and of the factor of interest (e.g. for Figure 4a: Breast-conserving surgery with radiotherapy, Breast conserving surgery without radiotherapy, and Mastectomy). For time since exposure the cut-points used to define the categories were chosen after inspection of the observed rates in Supplementary Table S3. For level  $k$  of the factor of interest, the cumulative rate in per-cent up to time  $T$  is then

$$100\sum(O_{ibc,t}/d_t y_t)$$

where  $O_{ibc,t}$  is the number of observed events in time category  $t$ ,  $y_t$  is the number of person-years in category  $t$ ,  $d_t$  is the length of category  $t$  in years, and summation is over all categories of  $t$  up to  $T$ . Confidence intervals for cumulative rates were calculated by first assuming that the numbers of IBCs in each category had a Poisson distribution for each individual dataset. In all the figures where cumulative rates are presented (Figure 4, 5, Supplementary Figure S4) checks were made that adjustment for the potential confounding factors made no material difference to the results.

### **References for Supplementary Text S1:**

StataCorp. Stata Statistical Software: Release 15.1 [program] StataCorp, Texas. 2017.

Rubin D. B. Multiple Imputation for Nonresponse in Surveys. John Wiley and Sons, New York. 1987.

Royston, P. and Lambert P.C. Flexible Parametric Survival Analysis Using Stata: Beyond the Cox Model. Stata Press, College Station, TX. 2011.

**Supplementary Table S1. Missing values in the characteristics of 29,044 women in England diagnosed with DCIS as a result of screening between April 2000 and March 2014.**

|                                                        | BCS + RT            | BCS - RT              | Mastectomy          | Total                 |
|--------------------------------------------------------|---------------------|-----------------------|---------------------|-----------------------|
| <b>DCIS size (mm)</b>                                  |                     |                       |                     |                       |
| <=10                                                   | 1523 (28.4)         | 6487 (42.7)           | 779 (9.2)           | 8789 (30.3)           |
| 11-20                                                  | 2057 (38.3)         | 4450 (29.3)           | 1547 (18.2)         | 8054 (27.7)           |
| 21-50                                                  | 1487 (27.7)         | 2829 (18.6)           | 3745 (44.1)         | 8061 (27.8)           |
| 51+                                                    | 72 (1.3)            | 208 (1.4)             | 1791 (21.1)         | 2071 (7.1)            |
| Missing                                                | 229 (4.3)           | 1214 (8.0)            | 626 (7.4)           | 2069 (7.1)            |
| <b>DCIS grade</b>                                      |                     |                       |                     |                       |
| Low/intermediate                                       | 1319 (24.6)         | 7631 (50.2)           | 2214 (26.1)         | 11,164 (38.4)         |
| High                                                   | 3831 (71.4)         | 6810 (44.8)           | 5823 (68.6)         | 16,464 (56.7)         |
| Missing                                                | 218 (4.1)           | 747 (4.9)             | 451 (5.3)           | 1416 (4.9)            |
| <b>Oestrogen receptor status and endocrine therapy</b> |                     |                       |                     |                       |
| ER+, no endocrine                                      | 1367 (25.5)         | 3640 (24.0)           | 2032 (23.9)         | 7039 (24.2)           |
| ER+, endocrine                                         | 478 (8.9)           | 2340 (15.4)           | 775 (9.1)           | 3593 (12.4)           |
| ER-                                                    | 524 (9.8)           | 1230 (8.1)            | 1184 (13.9)         | 2938 (10.1)           |
| Missing                                                | 2999 (55.9)         | 7978 (52.5)           | 4497 (53.0)         | 15,474 (53.3)         |
| <b>Laterality of DCIS</b>                              |                     |                       |                     |                       |
| Left                                                   | 2797 (52.1)         | 7767 (51.1)           | 4349 (51.2)         | 14,913 (51.3)         |
| Right                                                  | 2562 (47.7)         | 7314 (48.2)           | 4108 (48.4)         | 13,984 (48.1)         |
| Missing                                                | 9 (0.2)             | 107 (0.7)             | 31 (0.4)            | 147 (0.5)             |
| <b>Final margin distance (mm)</b>                      |                     |                       |                     |                       |
| 5+                                                     | 1763 (32.8)         | 3148 (20.7)           | 2297 (27.1)         | 7208 (24.8)           |
| 3-4                                                    | 542 (10.1)          | 1132 (7.5)            | 317 (3.7)           | 1991 (6.9)            |
| 1-2                                                    | 683 (12.7)          | 1605 (10.6)           | 535 (6.3)           | 2823 (9.7)            |
| Involved                                               | 77 (1.4)            | 203 (1.3)             | 128 (1.5)           | 408 (1.4)             |
| Before 2007                                            | 1184 (22.1)         | 5885 (38.7)           | 3223 (38.0)         | 10,292 (35.4)         |
| Missing                                                | 1119 (20.8)         | 3215 (21.2)           | 1988 (23.4)         | 6322 (21.8)           |
| <b>Total</b>                                           | <b>5368 (100.0)</b> | <b>15,188 (100.0)</b> | <b>8488 (100.0)</b> | <b>29,044 (100.0)</b> |

BCS+RT: breast-conserving surgery, radiotherapy recorded  
 BCS-RT: breast-conserving surgery, radiotherapy not recorded  
 ER+, no endocrine: oestrogen-receptor positive DCIS, endocrine therapy not recorded  
 ER+, endocrine: oestrogen-receptor positive DCIS, endocrine therapy recorded  
 ER-: oestrogen-receptor negative DCIS

**Supplementary Table S2. Numbers of women according to number of characteristics missing among the 29,044 women in England diagnosed with DCIS as a result of screening between April 2000 and March 2014.**

| Number of characteristics missing | Laterality | DCIS grade | DCIS size | Final margin distance | ER status | Number of women |
|-----------------------------------|------------|------------|-----------|-----------------------|-----------|-----------------|
| <b>None</b>                       | -          | -          | -         | -                     | -         | 9,537 (32.8%)   |
| <b>1 missing</b>                  |            |            |           |                       |           | 14,549 (50.1%)  |
|                                   | -          | -          | -         | -                     | m         | 11,274          |
|                                   | -          | -          | -         | m                     | -         | 2,782           |
|                                   | -          | m          | -         | -                     | -         | 233             |
|                                   | -          | -          | m         | -                     | -         | 219             |
|                                   | m          | -          | -         | -                     | -         | 41              |
| <b>2 missing</b>                  |            |            |           |                       |           | 4099 (14.1%)    |
|                                   | -          | -          | -         | m                     | m         | 2,676           |
|                                   | -          | -          | m         | -                     | m         | 478             |
|                                   | -          | m          | m         | -                     | -         | 337             |
|                                   | -          | m          | -         | -                     | m         | 236             |
|                                   | -          | -          | m         | m                     | -         | 209             |
|                                   | -          | m          | -         | m                     | -         | 77              |
|                                   | m          | -          | -         | -                     | m         | 74              |
|                                   | m          | -          | -         | m                     | -         | 6               |
|                                   | m          | -          | m         | -                     | -         | 4               |
|                                   | m          | m          | -         | -                     | -         | 2               |
| <b>3 missing</b>                  |            |            |           |                       |           | 755 (2.6%)      |
|                                   | -          | -          | m         | m                     | m         | 317             |
|                                   | -          | m          | m         | -                     | m         | 268             |
|                                   | -          | m          | m         | m                     | -         | 121             |
|                                   | -          | m          | -         | m                     | m         | 34              |
|                                   | m          | -          | m         | -                     | m         | 11              |
|                                   | m          | m          | -         | -                     | m         | 3               |
|                                   | m          | m          | m         | -                     | -         | 1               |
| <b>4 missing</b>                  |            |            |           |                       |           | 104 (0.4%)      |
|                                   | -          | m          | m         | m                     | m         | 99              |
|                                   | m          | m          | m         | -                     | m         | 4               |
|                                   | m          | m          | m         | m                     | -         | 1               |
| <b>Total number of women</b>      |            |            |           |                       |           | 29,044          |

**Supplementary Table S3. Person-years at risk and numbers of observed and expected deaths from all causes by age at DCIS diagnosis and time since DCIS diagnosis in 35,024 women with DCIS detected as a result of screening between January 1988 and March 2014.** Expected values are based on mortality rates for England and Wales in single calendar years and five-year age-groups.

|                                             | <b>Person-years at risk</b> | <b>Total number of deaths observed</b> | <b>Observed rate per 1000 person-years (95% confidence interval)</b> | <b>Total number of deaths expected</b> | <b>Ratio of observed to expected* (95% confidence interval)</b> |
|---------------------------------------------|-----------------------------|----------------------------------------|----------------------------------------------------------------------|----------------------------------------|-----------------------------------------------------------------|
| <b>Age at DCIS diagnosis</b>                |                             |                                        |                                                                      |                                        |                                                                 |
| <55                                         | 81,859                      | 396                                    | 4.84 ( 4.38 to 5.34)                                                 | 422.23                                 | 0.94 (0.85 to 1.03)                                             |
| 55-59                                       | 60,505                      | 482                                    | 7.97 ( 7.29 to 8.71)                                                 | 533.71                                 | 0.90 (0.83 to 0.99)                                             |
| 60-64                                       | 59,421                      | 697                                    | 11.73 (10.89 to 12.63)                                               | 856.38                                 | 0.81 (0.76 to 0.88)                                             |
| 65+                                         | 43,302                      | 659                                    | 15.22 (14.10 to 16.43)                                               | 1070.43                                | 0.62 (0.57 to 0.66)                                             |
| <i>P for heterogeneity:</i>                 |                             |                                        | <0.001                                                               |                                        | <0.001                                                          |
| <i>P for trend:</i>                         |                             |                                        | <0.001                                                               |                                        | <0.001                                                          |
| <b>Time since DCIS diagnosis (years)</b>    |                             |                                        |                                                                      |                                        |                                                                 |
| 5-                                          | 121,250                     | 655                                    | 5.40 ( 5.00 to 5.83)                                                 | 1026.38                                | 0.64 (0.59 to 0.69)                                             |
| 10-                                         | 79,072                      | 762                                    | 9.64 ( 8.98 to 10.35)                                                | 949.09                                 | 0.80 (0.75 to 0.86)                                             |
| 15+                                         | 32,512                      | 502                                    | 15.44 (14.15 to 16.85)                                               | 544.85                                 | 0.92 (0.84 to 1.01)                                             |
| 15+                                         | 12,253                      | 315                                    | 25.71 (23.02 to 28.71)                                               | 362.43                                 | 0.87 (0.78 to 0.97)                                             |
| <i>P for heterogeneity:</i>                 |                             |                                        | <0.001                                                               |                                        | <0.001                                                          |
| <i>P for trend:</i>                         |                             |                                        | <0.001                                                               |                                        | <0.001                                                          |
| <b>Total</b>                                | 245,087                     | 2234                                   | 9.12 ( 8.74 to 9.50)                                                 | 2882.75                                | 0.77 (0.74 to 0.81)                                             |
| <i>P for test of observed/expected = 1:</i> |                             |                                        |                                                                      |                                        | <0.001                                                          |

\*i. e. estimated ratio of observed rate to expected rate. See supplementary text 1 for further details

**Supplementary Table S4. Numbers of observed and expected deaths from all causes by calendar period of DCIS diagnosis and time since DCIS diagnosis in 35,024 women with DCIS detected as a result of screening between January 1988 and March 2014.** Expected values are based on mortality rates for England and Wales in single calendar years and five-year age-groups.

| Time since<br>DCIS<br>diagnosis<br>(years) | Year of diagnosis of DCIS |        |                     |           |        |                     |           |        |                     |           |        |                     |
|--------------------------------------------|---------------------------|--------|---------------------|-----------|--------|---------------------|-----------|--------|---------------------|-----------|--------|---------------------|
|                                            | 1988-1999                 |        |                     | 2000-2004 |        |                     | 2005-2009 |        |                     | 2010-2014 |        |                     |
|                                            | Obs                       | Exp    | Ratio* (95%CI)      | Obs       | Exp    | Ratio (95%CI)       | Obs       | Exp    | Ratio (95%CI)       | Obs       | Exp    | Ratio (95%CI)       |
| 0.5-                                       | 105                       | 156.15 | 0.67 (0.56 to 0.81) | 177       | 256.97 | 0.69 (0.59 to 0.80) | 263       | 426.94 | 0.62 (0.55 to 0.70) | 110       | 186.32 | 0.59 (0.49 to 0.71) |
| 5-                                         | 211                       | 237.29 | 0.89 (0.78 to 1.02) | 310       | 391.9  | 0.79 (0.71 to 0.88) | 241       | 319.91 | 0.75 (0.66 to 0.85) |           |        |                     |
| 10-                                        | 294                       | 324.33 | 0.91 (0.81 to 1.02) | 208       | 220.52 | 0.94 (0.82 to 1.08) |           |        |                     |           |        |                     |
| 15+                                        | 315                       | 362.43 | 0.87 (0.78 to 0.97) |           |        |                     |           |        |                     |           |        |                     |
| <b>Total</b>                               | 925                       | 1080.2 | 0.86 (0.80 to 0.91) | 695       | 869.38 | 0.80 (0.74 to 0.86) | 504       | 746.85 | 0.67 (0.62 to 0.74) | 110       | 186.32 | 0.59 (0.49 to 0.71) |

*P for trend with year of diagnosis: <0.001 (unadjusted), 0.50 (adjusted for time since diagnosis and age at diagnosis)*

Obs: total number of deaths observed

Exp: total number of deaths expected

CI: confidence interval

\*i. e. estimated ratio of observed rate to expected rate. See supplementary text 1 for further details

**Supplementary Table S5. Person-years at risk and numbers of observed and expected invasive breast cancers by age at DCIS diagnosis and time since DCIS diagnosis in 35,024 women with DCIS detected as a result of screening between January 1988 and March 2014.** Expected values are based on cancer incidence rates for England in single calendar years and five-year age-groups.

|                                                      | Person-years at risk | Number of invasive breast cancers observed | Observed rate per 1000 person-years (95% confidence interval) | Number of invasive breast cancers expected | Ratio of observed to expected* (95% confidence interval) |
|------------------------------------------------------|----------------------|--------------------------------------------|---------------------------------------------------------------|--------------------------------------------|----------------------------------------------------------|
| <b>Age at DCIS diagnosis</b>                         |                      |                                            |                                                               |                                            |                                                          |
| <55                                                  | 78,542               | 683                                        | 8.70 (8.07 to 9.37)                                           | 247.17                                     | 2.76 (2.56 to 2.98)                                      |
| 55-59                                                | 57,775               | 507                                        | 8.78 (8.04 to 9.57)                                           | 204.32                                     | 2.48 (2.27 to 2.71)                                      |
| 60-64                                                | 56,958               | 504                                        | 8.85 (8.11 to 9.66)                                           | 212.75                                     | 2.37 (2.17 to 2.59)                                      |
| 65+                                                  | 42,125               | 382                                        | 9.07 (8.20 to 10.0)                                           | 160.35                                     | 2.38 (2.16 to 2.63)                                      |
| <i>P for heterogeneity:</i>                          |                      |                                            | 0.93                                                          |                                            | 0.03                                                     |
| <i>P for trend:</i>                                  |                      |                                            | 0.52                                                          |                                            | 0.007                                                    |
| <b>Time since DCIS diagnosis (years)</b>             |                      |                                            |                                                               |                                            |                                                          |
| 0.5-                                                 | 16,264               | 56                                         | 3.44 (2.65 to 4.47)                                           | 53.00                                      | 1.06 (0.81 to 1.37)                                      |
| 1-                                                   | 30,086               | 211                                        | 7.01 (6.13 to 8.03)                                           | 98.89                                      | 2.13 (1.86 to 2.44)                                      |
| 2-                                                   | 27,041               | 240                                        | 8.88 (7.82 to 10.1)                                           | 90.05                                      | 2.67 (2.35 to 3.02)                                      |
| 3-                                                   | 46,172               | 448                                        | 9.70 (8.84 to 10.6)                                           | 157.06                                     | 2.85 (2.60 to 3.13)                                      |
| 5-                                                   | 36,842               | 347                                        | 9.42 (8.48 to 10.5)                                           | 129.30                                     | 2.68 (2.42 to 2.98)                                      |
| 7-                                                   | 38,368               | 394                                        | 10.3 (9.30 to 11.3)                                           | 139.57                                     | 2.82 (2.56 to 3.12)                                      |
| 10-                                                  | 29,781               | 283                                        | 9.50 (8.46 to 10.7)                                           | 113.40                                     | 2.50 (2.22 to 2.80)                                      |
| 15-                                                  | 9015                 | 77                                         | 8.54 (6.83 to 10.7)                                           | 35.61                                      | 2.16 (1.73 to 2.70)                                      |
| 20+                                                  | 1830                 | 20                                         | 10.9 (7.05 to 16.9)                                           | 7.71                                       | 2.59 (1.67 to 4.02)                                      |
| <i>P for heterogeneity:</i>                          |                      |                                            | <0.001                                                        |                                            | <0.001                                                   |
| <i>P for trend excluding 1<sup>st</sup> 3 years:</i> |                      |                                            | <0.001                                                        |                                            | 0.53                                                     |
| <b>Total</b>                                         | 235,400              | 2076                                       | 8.82 (8.45 to 9.21)                                           | 824.59                                     | 2.52 (2.41 to 2.63)                                      |
| <i>P for test of observed/expected = 1:</i>          |                      |                                            |                                                               |                                            | <0.001                                                   |
| <b>Total 3+ years</b>                                | 162,009              | 1569                                       | 9.68 (9.22 to 10.2)                                           | 582.65                                     | 2.69 (2.56 to 2.83)                                      |
| <i>P for test of observed/expected 3+ years = 1:</i> |                      |                                            |                                                               |                                            | <0.001                                                   |

\*i. e. estimated ratio of observed rate to expected rate. See supplementary text 1 for further details

**Supplementary Table S6. Numbers of observed and expected invasive breast cancers by calendar period of DCIS diagnosis and time since DCIS diagnosis in 35,024 women with DCIS detected as a result of screening between January 1988 and March 2014.** Expected values are based on cancer incidence rates for England in single calendar years and five-year age-groups.

| Time since DCIS diagnosis (years)                                                                                           | Year of diagnosis of DCIS |        |                     |           |        |                     |           |        |                     |           |       |                     |
|-----------------------------------------------------------------------------------------------------------------------------|---------------------------|--------|---------------------|-----------|--------|---------------------|-----------|--------|---------------------|-----------|-------|---------------------|
|                                                                                                                             | 1988-1999                 |        |                     | 2000-2004 |        |                     | 2005-2009 |        |                     | 2010-2014 |       |                     |
|                                                                                                                             | Obs                       | Exp    | Ratio* (95%CI)      | Obs       | Exp    | Ratio (95%CI)       | Obs       | Exp    | Ratio (95%CI)       | Obs       | Exp   | Ratio (95%CI)       |
| 0.5-                                                                                                                        | 12                        | 5.55   | 2.16 (1.23 to 3.80) | 14        | 11.67  | 1.20 (0.71 to 2.03) | 15        | 18.06  | 0.83 (0.50 to 1.38) | 15        | 17.71 | 0.85 (0.51 to 1.40) |
| 1-                                                                                                                          | 35                        | 11.34  | 3.09 (2.22 to 4.30) | 46        | 23.46  | 1.96 (1.47 to 2.62) | 73        | 35.90  | 2.03 (1.62 to 2.56) | 57        | 28.18 | 2.02 (1.56 to 2.62) |
| 2-                                                                                                                          | 32                        | 11.67  | 2.74 (1.94 to 3.88) | 62        | 23.50  | 2.64 (2.06 to 3.38) | 90        | 35.64  | 2.52 (2.05 to 3.10) | 56        | 19.24 | 2.91 (2.24 to 3.78) |
| 3-                                                                                                                          | 76                        | 24.65  | 3.08 (2.46 to 3.86) | 128       | 46.89  | 2.73 (2.30 to 3.25) | 191       | 70.88  | 2.69 (2.34 to 3.11) | 53        | 14.65 | 3.62 (2.76 to 4.74) |
| 5-                                                                                                                          | 71                        | 25.80  | 2.75 (2.18 to 3.47) | 109       | 46.11  | 2.36 (1.96 to 2.85) | 167       | 57.38  | 2.91 (2.50 to 3.39) |           |       |                     |
| 7-                                                                                                                          | 121                       | 38.96  | 3.11 (2.60 to 3.71) | 192       | 68.71  | 2.79 (2.43 to 3.22) | 81        | 31.9   | 2.54 (2.04 to 3.16) |           |       |                     |
| 10-                                                                                                                         | 167                       | 63.33  | 2.64 (2.27 to 3.07) | 116       | 50.06  | 2.32 (1.93 to 2.78) |           |        |                     |           |       |                     |
| 15-                                                                                                                         | 77                        | 35.61  | 2.16 (1.73 to 2.70) |           |        |                     |           |        |                     |           |       |                     |
| 20+                                                                                                                         | 20                        | 7.71   | 2.59 (1.67 to 4.02) |           |        |                     |           |        |                     |           |       |                     |
| <b>Total</b>                                                                                                                | 611                       | 224.62 | 2.72 (2.51 to 2.94) | 667       | 270.41 | 2.47 (2.29 to 2.66) | 617       | 249.77 | 2.47 (2.28 to 2.67) | 181       | 79.78 | 2.27 (1.96 to 2.62) |
| <i>P for trend with year of diagnosis: 0.03 (unadjusted), 0.26 (adjusted for time since diagnosis and age at diagnosis)</i> |                           |        |                     |           |        |                     |           |        |                     |           |       |                     |

Obs: number of cancers observed

Exp: number of cancers expected

CI: confidence interval

\*i. e. estimated ratio of observed rate to expected rate. See supplementary text 1 for further details

**Supplementary Table S7. Numbers of person-years at risk, numbers of observed and expected invasive breast cancers, and cumulative risks by date of DCIS diagnosis and time since DCIS diagnosis in 35,024 women with DCIS detected as a result of screening between January 1988 and March 2014.** Expected values are based on cancer incidence rates for England in single calendar years and five-year age-groups

| Date of diagnosis of DCIS | Time since DCIS diagnosis (years) | Number of person-years | Number of invasive breast cancers observed | Cumulative observed risk* | 95% confidence interval for cumulative observed risk* | Number of invasive breast cancers expected* | Cumulative expected risk* |
|---------------------------|-----------------------------------|------------------------|--------------------------------------------|---------------------------|-------------------------------------------------------|---------------------------------------------|---------------------------|
| 1988-1999                 | 0.5-                              | 2081                   | 12                                         | 0.3                       | 0.1 to 0.5                                            | 5.6                                         | 0.1                       |
|                           | 1-                                | 4125                   | 35                                         | 1.1                       | 0.8 to 1.4                                            | 11.3                                        | 0.4                       |
|                           | 2-                                | 4076                   | 32                                         | 1.9                       | 1.5 to 2.3                                            | 11.7                                        | 0.7                       |
|                           | 3-                                | 4024                   | 33                                         | 2.7                       | 2.2 to 3.2                                            | 12.1                                        | 1.0                       |
|                           | 4-                                | 3962                   | 43                                         | 3.7                       | 3.1 to 4.3                                            | 12.5                                        | 1.3                       |
|                           | 5-                                | 3899                   | 35                                         | 4.6                       | 3.9 to 5.2                                            | 12.8                                        | 1.6                       |
|                           | 6-                                | 3827                   | 36                                         | 5.4                       | 4.7 to 6.1                                            | 13.0                                        | 1.9                       |
|                           | 7-                                | 3758                   | 37                                         | 6.3                       | 5.6 to 7.1                                            | 13.0                                        | 2.3                       |
|                           | 8-                                | 3687                   | 45                                         | 7.4                       | 6.6 to 8.2                                            | 13.0                                        | 2.6                       |
|                           | 9-                                | 3611                   | 39                                         | 8.3                       | 7.5 to 9.2                                            | 13.0                                        | 2.9                       |
|                           | 10-                               | 3534                   | 43                                         | 9.4                       | 8.5 to 10.3                                           | 12.9                                        | 3.2                       |
|                           | 11-                               | 3456                   | 28                                         | 10.0                      | 9.1 to 11.0                                           | 12.7                                        | 3.6                       |
|                           | 12-                               | 3382                   | 32                                         | 10.8                      | 9.9 to 11.8                                           | 12.6                                        | 3.9                       |
|                           | 13-                               | 3317                   | 16                                         | 11.2                      | 10.2 to 12.1                                          | 12.6                                        | 4.2                       |
|                           | 14-                               | 3241                   | 48                                         | 12.3                      | 11.3 to 13.3                                          | 12.6                                        | 4.6                       |
|                           | 15-                               | 2839                   | 22                                         | 12.9                      | 11.9 to 13.9                                          | 11.2                                        | 4.9                       |
|                           | 16-                               | 2221                   | 17                                         | 13.5                      | 12.4 to 14.5                                          | 8.8                                         | 5.2                       |
|                           | 17-                               | 1718                   | 10                                         | 13.9                      | 12.8 to 15.0                                          | 6.8                                         | 5.5                       |
|                           | 18-                               | 1280                   | 18                                         | 14.9                      | 13.7 to 16.0                                          | 5.1                                         | 5.8                       |
| 19+                       | 2786                              | 30                     | 15.6†                                      | 14.3 to 16.8              | 11.5                                                  | 6.1†                                        |                           |
| 2000-2004                 | 0.5-                              | 3516                   | 14                                         | 0.2                       | 0.1 to 0.3                                            | 11.7                                        | 0.2                       |
|                           | 1-                                | 6987                   | 46                                         | 0.9                       | 0.6 to 1.1                                            | 23.5                                        | 0.5                       |
|                           | 2-                                | 6905                   | 62                                         | 1.7                       | 1.4 to 2.0                                            | 23.5                                        | 0.8                       |
|                           | 3-                                | 6800                   | 67                                         | 2.7                       | 2.3 to 3.1                                            | 23.5                                        | 1.2                       |
|                           | 4-                                | 6702                   | 61                                         | 3.5                       | 3.1 to 4.0                                            | 23.4                                        | 1.5                       |
|                           | 5-                                | 6600                   | 61                                         | 4.4                       | 3.9 to 4.9                                            | 23.2                                        | 1.8                       |
|                           | 6-                                | 6504                   | 48                                         | 5.1                       | 4.6 to 5.6                                            | 22.9                                        | 2.2                       |
|                           | 7-                                | 6414                   | 51                                         | 5.8                       | 5.3 to 6.3                                            | 22.8                                        | 2.5                       |
|                           | 8-                                | 6299                   | 91                                         | 7.1                       | 6.5 to 7.7                                            | 22.8                                        | 2.8                       |
|                           | 9-                                | 6163                   | 50                                         | 7.8                       | 7.2 to 8.4                                            | 23.1                                        | 3.2                       |
|                           | 10-                               | 5265                   | 40                                         | 8.4                       | 7.8 to 9.1                                            | 20.2                                        | 3.5                       |
|                           | 11-                               | 3723                   | 47                                         | 9.5                       | 8.8 to 10.2                                           | 14.5                                        | 3.9                       |
|                           | 12-                               | 2325                   | 17                                         | 10.1                      | 9.3 to 10.8                                           | 9.2                                         | 4.2                       |
|                           | 13-                               | 1208                   | 10                                         | 10.7                      | 9.9 to 11.6                                           | 4.9                                         | 4.5                       |
| 14+                       | 331                               | 2                      | 11.2†                                      | 10.1 to 12.2              | 1.4                                                   | 4.9†                                        |                           |
| 2005-2009                 | 0.5-                              | 5358                   | 15                                         | 0.1                       | 0.1 to 0.2                                            | 18.1                                        | 0.2                       |
|                           | 1-                                | 10635                  | 73                                         | 0.8                       | 0.7 to 1.0                                            | 35.9                                        | 0.5                       |
|                           | 2-                                | 10507                  | 90                                         | 1.7                       | 1.4 to 1.9                                            | 35.6                                        | 0.8                       |
|                           | 3-                                | 10358                  | 101                                        | 2.6                       | 2.3 to 2.9                                            | 35.4                                        | 1.2                       |
|                           | 4-                                | 10211                  | 90                                         | 3.4                       | 3.1 to 3.8                                            | 35.5                                        | 1.5                       |
|                           | 5-                                | 9075                   | 121                                        | 4.7                       | 4.3 to 5.1                                            | 32.2                                        | 1.8                       |
|                           | 6-                                | 6937                   | 46                                         | 5.3                       | 4.8 to 5.7                                            | 25.2                                        | 2.2                       |
|                           | 7-                                | 4769                   | 42                                         | 6.1                       | 5.6 to 6.5                                            | 17.8                                        | 2.5                       |
|                           | 8-                                | 2762                   | 33                                         | 7.1                       | 6.5 to 7.7                                            | 10.6                                        | 2.9                       |
|                           | 9+                                | 906                    | 6                                          | 7.7†                      | 6.9 to 8.4                                            | 3.6                                         | 3.2†                      |
| 2010-2014                 | 0.5-                              | 5310                   | 15                                         | 0.1                       | 0.1 to 0.2                                            | 17.7                                        | 0.2                       |
|                           | 1-                                | 8339                   | 57                                         | 0.8                       | 0.6 to 1.0                                            | 28.2                                        | 0.5                       |
|                           | 2-                                | 5553                   | 56                                         | 1.8                       | 1.5 to 2.1                                            | 19.2                                        | 0.8                       |
|                           | 3-                                | 3127                   | 34                                         | 2.8                       | 2.4 to 3.3                                            | 11.1                                        | 1.2                       |
|                           | 4+                                | 989                    | 19                                         | 4.6†                      | 3.7 to 5.6                                            | 3.6                                         | 1.5†                      |

Cumulative risks take into account competing risks from other causes of death. See supplementary text 1 for further details

\*Risks given for the end of each period, i.e. risks in line '9-' refer to 10 years after diagnosis, etc

†Risks at 20, 15, 10, and 5 years after diagnosis of DCIS respectively.



**Supplementary Table S8. Person-years at risk and numbers of observed and expected invasive breast cancers by surgery, whether both breasts were affected and time since diagnosis in 30,559 women with DCIS detected as a result of screening between April 2000 and March 2014.** Expected values are based on cancer incidence rates for England in single calendar years and five-year age-groups.

|                                                  | Person-years at risk | Number of invasive breast cancers observed | Observed rate per 1000 person-years (95% confidence interval) | Number of invasive breast cancers expected | Ratio of observed to expected* (95% confidence interval) |
|--------------------------------------------------|----------------------|--------------------------------------------|---------------------------------------------------------------|--------------------------------------------|----------------------------------------------------------|
| <b>Less than 3 years since diagnosis of DCIS</b> |                      |                                            |                                                               |                                            |                                                          |
| Unilateral with surgery                          | 59,518               | 383                                        | 6.43 (5.82 to 7.11)                                           | 201.31                                     | 1.90 (1.72 to 2.10)                                      |
| Unilateral with no/unknown surgery               | 2875                 | 37                                         | 12.87 (9.32 to 17.8)                                          | 9.75                                       | 3.80 (2.75 to 5.24)                                      |
| Bilateral                                        | 126                  | 2                                          | 15.82 (3.96 to 63.3)                                          | 0.43                                       | 4.63 (1.16 to 18.5)                                      |
| <i>P for heterogeneity:</i>                      |                      |                                            | <i>&lt;0.001</i>                                              |                                            | <i>&lt;0.001</i>                                         |
| Total less than 3 years since diagnosis of DCIS  | 62,520               | 422                                        | 6.75 (6.14 to 7.43)                                           | 211.49                                     | 2.00 (1.81 to 2.20)                                      |
| <b>At least 3 years since diagnosis of DCIS</b>  |                      |                                            |                                                               |                                            |                                                          |
| Unilateral with surgery                          | 98,639               | 933                                        | 9.46 (8.87 to 10.1)                                           | 354.54                                     | 2.63 (2.47 to 2.81)                                      |
| Unilateral with no/unknown surgery               | 6121                 | 75                                         | 12.25 (9.77 to 15.4)                                          | 22.16                                      | 3.38 (2.70 to 4.24)                                      |
| Bilateral                                        | 212                  | 3                                          | 14.12 (4.55 to 43.8)                                          | 0.76                                       | 3.96 (1.28 to 12.30)                                     |
| <i>P for heterogeneity:</i>                      |                      |                                            | <i>0.09</i>                                                   |                                            | <i>0.11</i>                                              |
| Total at least 3 years since diagnosis of DCIS   | 104,972              | 1011                                       | 9.63 (9.06 to 10.24)                                          | 377.46                                     | 2.68 (2.52 to 2.85)                                      |
| <b>All years since diagnosis of DCIS</b>         |                      |                                            |                                                               |                                            |                                                          |
| Unilateral with surgery                          | 158,157              | 1316                                       | 8.32 ( 7.88 to 8.78)                                          | 555.85                                     | 2.37 (2.24 to 2.50)                                      |
| Unilateral with no/unknown surgery               | 8996                 | 112                                        | 12.45 (10.4 to 15.0)                                          | 31.91                                      | 3.51 (2.92 to 4.22)                                      |
| Bilateral                                        | 339                  | 5                                          | 14.75 ( 6.14 to 35.5)                                         | 1.19                                       | 4.21 (1.75 to 10.1)                                      |
| <i>P for heterogeneity:</i>                      |                      |                                            | <i>&lt;0.001</i>                                              |                                            | <i>&lt;0.001</i>                                         |
| <b>Total</b>                                     | 167,492              | 1433                                       | 8.56 ( 8.12 to 9.01)                                          | 588.95                                     | 2.43 (2.31 to 2.56)                                      |

\*i. e. estimated ratio of observed rate to expected rate. See supplementary text 1 for further details

**Supplementary Table S9. Person-years at risk and numbers of observed and expected breast cancer deaths by age at DCIS diagnosis and time since DCIS diagnosis in 35,024 women with DCIS detected as a result of screening between January 1988 and March 2014.** Expected values are based on mortality rates for England and Wales in single calendar years and five-year age-groups.

|                                                      | Person-years at risk | Number of breast cancer deaths observed | Observed rate per 1000 person-years (95% confidence interval) | Number of breast cancer deaths expected | Ratio of observed to expected* (95% confidence interval) |
|------------------------------------------------------|----------------------|-----------------------------------------|---------------------------------------------------------------|-----------------------------------------|----------------------------------------------------------|
| <b>Age at DCIS diagnosis</b>                         |                      |                                         |                                                               |                                         |                                                          |
| <55                                                  | 81,859               | 92                                      | 1.12 (0.92 to 1.38)                                           | 44.37                                   | 2.07 (1.69 to 2.54)                                      |
| 55-59                                                | 60,505               | 78                                      | 1.29 (1.03 to 1.61)                                           | 42.13                                   | 1.85 (1.48 to 2.31)                                      |
| 60-64                                                | 59,421               | 82                                      | 1.38 (1.11 to 1.71)                                           | 50.21                                   | 1.63 (1.32 to 2.03)                                      |
| 65+                                                  | 43,302               | 58                                      | 1.34 (1.04 to 1.73)                                           | 45.38                                   | 1.28 (0.99 to 1.65)                                      |
| <i>P for heterogeneity:</i>                          |                      |                                         | 0.54                                                          |                                         | 0.03                                                     |
| <i>P for trend:</i>                                  |                      |                                         | 0.20                                                          |                                         | 0.003                                                    |
| <b>Time since DCIS diagnosis (years)</b>             |                      |                                         |                                                               |                                         |                                                          |
| 0.5-                                                 | 121,250              | 70                                      | 0.58 (0.46 to 0.73)                                           | 80.58                                   | 0.87 (0.69 to 1.10)                                      |
| 5-                                                   | 79,072               | 118                                     | 1.49 (1.25 to 1.79)                                           | 59.69                                   | 1.98 (1.65 to 2.37)                                      |
| 10-                                                  | 32,512               | 84                                      | 2.58 (2.09 to 3.20)                                           | 28.09                                   | 2.99 (2.41 to 3.70)                                      |
| 15+                                                  | 12,253               | 38                                      | 3.10 (2.26 to 4.26)                                           | 13.74                                   | 2.77 (2.01 to 3.80)                                      |
| <i>P for heterogeneity:</i>                          |                      |                                         | <0.001                                                        |                                         | <0.001                                                   |
| <i>P for trend excluding 1<sup>st</sup> 5 years:</i> |                      |                                         | <0.001                                                        |                                         | 0.01                                                     |
| <b>Total</b>                                         | 245,087              | 310                                     | 1.26 (1.13 to 1.41)                                           | 182.1                                   | 1.70 (1.52 to 1.90)                                      |
| <i>P for test of observed/expected = 1:</i>          |                      |                                         |                                                               |                                         | <0.001                                                   |
| <b>Total 5+ years</b>                                | 123,837              | 240                                     | 1.94 (1.71 to 2.20)                                           | 101.52                                  | 2.36 (2.08 to 2.68)                                      |
| <i>P for test of observed/expected 5+ years = 1:</i> |                      |                                         |                                                               |                                         | <0.001                                                   |

\*i. e. estimated ratio of observed rate to expected rate. See supplementary text 1 for further details

**Supplementary Table S10 Numbers of observed and expected breast cancer deaths by calendar period of DCIS diagnosis and time since DCIS diagnosis in 35,024 women with DCIS detected as a result of screening between January 1988 and March 2014.** Expected values are based on mortality rates for England and Wales in single calendar years and five-year age-groups.

| Time since DCIS diagnosis (years) | Year of diagnosis of DCIS |       |                     |           |       |                     |           |       |                     |           |       |                     |
|-----------------------------------|---------------------------|-------|---------------------|-----------|-------|---------------------|-----------|-------|---------------------|-----------|-------|---------------------|
|                                   | 1988-1999                 |       |                     | 2000-2004 |       |                     | 2005-2009 |       |                     | 2010-2014 |       |                     |
|                                   | Obs                       | Exp   | Ratio* (95%CI)      | Obs       | Exp   | Ratio (95%CI)       | Obs       | Exp   | Ratio (95%CI)       | Obs       | Exp   | Ratio               |
| 0.5-                              | 9                         | 14.51 | 0.62 (0.32 to 1.19) | 22        | 21.55 | 1.02 (0.67 to 1.55) | 32        | 31.13 | 1.03 (0.73 to 1.45) | 7         | 13.38 | 0.52 (0.25 to 1.10) |
| 5-                                | 41                        | 16.47 | 2.49 (1.83 to 3.38) | 50        | 24.96 | 2.00 (1.52 to 2.64) | 27        | 18.26 | 1.48 (1.01 to 2.16) |           |       |                     |
| 10-                               | 58                        | 16.91 | 3.43 (2.65 to 4.44) | 26        | 11.18 | 2.32 (1.58 to 3.41) |           |       |                     |           |       |                     |
| 15+                               | 38                        | 13.74 | 2.77 (2.01 to 3.80) |           |       |                     |           |       |                     |           |       |                     |
| <b>Total</b>                      | 146                       | 61.63 | 2.37 (2.01 to 2.79) | 98        | 57.7  | 1.70 (1.39 to 2.07) | 59        | 49.4  | 1.19 (0.93 to 1.54) | 7         | 13.38 | 0.52 (0.25 to 1.10) |

*P for trend with year of diagnosis:* <0.0001 (unadjusted), 0.09 (adjusted for time since diagnosis and age at diagnosis)

Obs: number of breast cancer deaths observed  
 Exp: number of breast cancer deaths expected  
 CI: confidence interval

\*i. e. estimated ratio of observed rate to expected rate. See supplementary text 1 for further details

**Supplementary Table S11. Numbers of person-years at risk, numbers of observed and expected breast cancer deaths, and cumulative risks by date of DCIS diagnosis and time since DCIS diagnosis in 35,024 women with DCIS detected as a result of screening between January 1988 and March 2014.** Expected values are based on mortality rates for England and Wales in single calendar years and five-year age-groups.

| Date of diagnosis of DCIS | Time since DCIS diagnosis (years) | Number of person-years | Number of breast cancer deaths observed | Cumulative observed risk* | 95% confidence interval for cumulative observed risk* | Number of breast cancer deaths expected* | Cumulative expected risk* |
|---------------------------|-----------------------------------|------------------------|-----------------------------------------|---------------------------|-------------------------------------------------------|------------------------------------------|---------------------------|
| 1988-1999                 | 0.5-                              | 2084                   | 1                                       | 0                         | 0.00 to 0.04                                          | 1.6                                      | 0.0                       |
|                           | 1-                                | 4156                   | 1                                       | 0                         | 0.00 to 0.09                                          | 3.2                                      | 0.1                       |
|                           | 2-                                | 4137                   | 2                                       | 0.1                       | 0.03 to 0.19                                          | 3.2                                      | 0.2                       |
|                           | 3-                                | 4113                   | 4                                       | 0.2                       | 0.1 to 0.3                                            | 3.2                                      | 0.3                       |
|                           | 4-                                | 4084                   | 1                                       | 0.2                       | 0.1 to 0.4                                            | 3.2                                      | 0.3                       |
|                           | 5-                                | 4053                   | 7                                       | 0.4                       | 0.2 to 0.6                                            | 3.3                                      | 0.4                       |
|                           | 6-                                | 4011                   | 8                                       | 0.6                       | 0.3 to 0.8                                            | 3.3                                      | 0.5                       |
|                           | 7-                                | 3964                   | 10                                      | 0.8                       | 0.5 to 1.1                                            | 3.3                                      | 0.6                       |
|                           | 8-                                | 3919                   | 7                                       | 1.0                       | 0.7 to 1.3                                            | 3.3                                      | 0.7                       |
|                           | 9-                                | 3879                   | 9                                       | 1.2                       | 0.9 to 1.5                                            | 3.3                                      | 0.7                       |
|                           | 10-                               | 3824                   | 13                                      | 1.5                       | 1.1 to 1.9                                            | 3.4                                      | 0.8                       |
|                           | 11-                               | 3766                   | 12                                      | 1.8                       | 1.4 to 2.2                                            | 3.4                                      | 0.9                       |
|                           | 12-                               | 3709                   | 15                                      | 2.2                       | 1.7 to 2.6                                            | 3.4                                      | 1.0                       |
|                           | 13-                               | 3654                   | 3                                       | 2.2                       | 1.8 to 2.7                                            | 3.4                                      | 1.1                       |
|                           | 14-                               | 3593                   | 15                                      | 2.6                       | 2.1 to 3.1                                            | 3.4                                      | 1.2                       |
|                           | 15-                               | 3174                   | 4                                       | 2.7                       | 2.2 to 3.2                                            | 3.1                                      | 1.2                       |
|                           | 16-                               | 2492                   | 8                                       | 3.0                       | 2.4 to 3.5                                            | 2.6                                      | 1.3                       |
|                           | 17-                               | 1934                   | 6                                       | 3.2                       | 2.7 to 3.8                                            | 2.1                                      | 1.4                       |
|                           | 18-                               | 1458                   | 5                                       | 3.5                       | 2.9 to 4.1                                            | 1.7                                      | 1.5                       |
| 19+                       | 3196                              | 15                     | 3.8†                                    | 3.2 to 4.5                | 4.3                                                   | 1.6†                                     |                           |
| 2000-2004                 | 0.5-                              | 3519                   | 1                                       | 0                         | 0.00 to 0.04                                          | 2.3                                      | 0.0                       |
|                           | 1-                                | 7022                   | 2                                       | 0                         | 0.00 to 0.09                                          | 4.7                                      | 0.1                       |
|                           | 2-                                | 6991                   | 5                                       | 0.1                       | 0.03 to 0.19                                          | 4.8                                      | 0.2                       |
|                           | 3-                                | 6951                   | 6                                       | 0.2                       | 0.1 to 0.3                                            | 4.8                                      | 0.2                       |
|                           | 4-                                | 6902                   | 8                                       | 0.3                       | 0.2 to 0.4                                            | 4.9                                      | 0.3                       |
|                           | 5-                                | 6851                   | 12                                      | 0.5                       | 0.3 to 0.6                                            | 4.9                                      | 0.4                       |
|                           | 6-                                | 6791                   | 10                                      | 0.6                       | 0.4 to 0.8                                            | 5.0                                      | 0.4                       |
|                           | 7-                                | 6738                   | 7                                       | 0.7                       | 0.5 to 0.9                                            | 5.0                                      | 0.5                       |
|                           | 8-                                | 6681                   | 10                                      | 0.9                       | 0.6 to 1.1                                            | 5.0                                      | 0.6                       |
|                           | 9-                                | 6605                   | 11                                      | 1.0                       | 0.8 to 1.2                                            | 5.1                                      | 0.7                       |
|                           | 10-                               | 5675                   | 13                                      | 1.2                       | 1.0 to 1.5                                            | 4.4                                      | 0.7                       |
|                           | 11-                               | 4036                   | 10                                      | 1.4                       | 1.2 to 1.7                                            | 3.2                                      | 0.8                       |
|                           | 12-                               | 2546                   | 1                                       | 1.5                       | 1.2 to 1.8                                            | 2.1                                      | 0.9                       |
|                           | 13-                               | 1338                   | 2                                       | 1.6                       | 1.3 to 2.0                                            | 1.1                                      | 0.9                       |
| 14+                       | 372                               | 0                      | 1.6†                                    | 1.3 to 2.0                | 0.3                                                   | 1.0†                                     |                           |
| 2005-2009                 | 0.5-                              | 5360                   | 2                                       | 0                         | 0.00 to 0.04                                          | 3.4                                      | 0.0                       |
|                           | 1-                                | 10682                  | 10                                      | 0.1                       | 0.05 to 0.18                                          | 6.8                                      | 0.1                       |
|                           | 2-                                | 10631                  | 7                                       | 0.2                       | 0.1 to 0.3                                            | 6.9                                      | 0.2                       |
|                           | 3-                                | 10576                  | 8                                       | 0.3                       | 0.2 to 0.3                                            | 6.9                                      | 0.2                       |
|                           | 4-                                | 10511                  | 5                                       | 0.3                       | 0.2 to 0.4                                            | 7.0                                      | 0.3                       |
|                           | 5-                                | 9428                   | 10                                      | 0.4                       | 0.3 to 0.5                                            | 6.5                                      | 0.4                       |
|                           | 6-                                | 7248                   | 5                                       | 0.5                       | 0.3 to 0.6                                            | 5.2                                      | 0.4                       |
|                           | 7-                                | 5014                   | 7                                       | 0.6                       | 0.4 to 0.8                                            | 3.7                                      | 0.5                       |
|                           | 8-                                | 2925                   | 4                                       | 0.7                       | 0.5 to 0.9                                            | 2.2                                      | 0.6                       |
| 9+                        | 966                               | 1                      | 0.8†                                    | 0.5 to 1.1                | 0.7                                                   | 0.6†                                     |                           |
| 2010-2014                 | 0.5-                              | 5313                   | 0                                       | 0                         | 0.00 to 0.00                                          | 2.9                                      | 0.0                       |
|                           | 1-                                | 8382                   | 4                                       | 0                         | 0.00 to 0.09                                          | 4.7                                      | 0.1                       |
|                           | 2-                                | 5623                   | 3                                       | 0.1                       | 0.02 to 0.18                                          | 3.3                                      | 0.1                       |
|                           | 3-                                | 3189                   | 0                                       | 0.1                       | 0.02 to 0.18                                          | 1.9                                      | 0.2                       |
|                           | 4+                                | 1023                   | 0                                       | 0.1†                      | 0.02 to 0.18                                          | 0.6                                      | 0.3†                      |

Cumulative risks take into account competing risks from other causes of death. See supplementary text 1 for further details

\*Risks given for the end of each period, i.e. risks in line '9-' refer to 10 years after diagnosis, etc

†Risks at 20, 15, 10, and 5 years after diagnosis of DCIS respectively

**Supplementary Table S12. Person-years at risk and numbers of observed and expected breast cancer deaths by surgery, whether both breasts were affected and time since diagnosis in 30,559 women with DCIS detected as a result of screening between April 2000 and March 2014.** Expected values are based on mortality rates for England and Wales in single calendar years and five-year age-groups.

|                                                  | Person-years at risk | Number of breast cancer deaths observed | Observed rate per 1000 person-years (95% confidence interval) | Number of breast cancer deaths expected | Ratio of observed to expected* (95% confidence interval) |
|--------------------------------------------------|----------------------|-----------------------------------------|---------------------------------------------------------------|-----------------------------------------|----------------------------------------------------------|
| <b>Less than 5 years since diagnosis of DCIS</b> |                      |                                         |                                                               |                                         |                                                          |
| Unilateral with surgery                          | 96,650               | 52                                      | 0.54 (0.41 to 0.71)                                           | 62.05                                   | 0.84 (0.64 to 1.10)                                      |
| Unilateral with no/unknown surgery               | 4748                 | 9                                       | 1.90 (0.99 to 3.64)                                           | 3.15                                    | 2.86 (1.49 to 5.49)                                      |
| Bilateral                                        | 207                  | 0                                       | -                                                             | 0.13                                    | -                                                        |
| <i>P for heterogeneity:</i>                      |                      |                                         | 0.009                                                         |                                         | 0.01                                                     |
| Total less than 5 years since diagnosis of DCIS  | 101,605              | 61                                      | 0.60 (0.47 to 0.77)                                           | 35.33                                   | 0.93 (0.73 to 1.20)                                      |
| <b>At least 5 years since diagnosis of DCIS</b>  |                      |                                         |                                                               |                                         |                                                          |
| Unilateral with surgery                          | 66,169               | 84                                      | 1.27 (1.03 to 1.57)                                           | 48.97                                   | 1.72 (1.38 to 2.12)                                      |
| Unilateral with no/unknown surgery               | 4666                 | 14                                      | 3.00 (1.78 to 5.07)                                           | 3.6                                     | 3.89 (2.31 to 6.57)                                      |
| Bilateral                                        | 141                  | 1                                       | 7.07 (1.00 to 50.2)                                           | 0.1                                     | 9.96 (1.40 to 70.7)                                      |
| <i>P for heterogeneity:</i>                      |                      |                                         | 0.01                                                          |                                         | 0.02                                                     |
| Total at least 5 years since diagnosis of DCIS   | 70977                | 99                                      | 1.39 (1.15 to 1.70)                                           | 52.67                                   | 1.88 (1.54 to 2.29)                                      |
| <b>All years since diagnosis of DCIS</b>         |                      |                                         |                                                               |                                         |                                                          |
| Unilateral with surgery                          | 162,820              | 136                                     | 0.84 (0.71 to 0.99)                                           | 111.03                                  | 1.22 (1.04 to 1.45)                                      |
| Unilateral with no/unknown surgery               | 9414                 | 23                                      | 2.44 (1.62 to 3.68)                                           | 6.75                                    | 3.41 (2.27 to 5.13)                                      |
| Bilateral                                        | 349                  | 1                                       | 2.87 (0.40 to 20.4)                                           | 0.23                                    | 4.30 (0.61 to 30.5)                                      |
| <i>P for heterogeneity:</i>                      |                      |                                         | <0.001                                                        |                                         | <0.001                                                   |
| <b>Total</b>                                     | 172,583              | 160                                     | 0.93 (0.79 to 1.08)                                           | 118                                     | 1.36 (1.16 to 1.58)                                      |

\*i. e. estimated ratio of observed rate to expected rate. See supplementary text 1 for further details

**Supplementary Table S13. Characteristics and vital status on 31 December 2014 of 24,779 women diagnosed with unilateral DCIS detected as a result of screening between April 2000 and March 2014 and who received surgery.** Women recorded with oestrogen-receptor positive DCIS and receiving endocrine therapy are excluded.

|                                      | Treatment          |                      |                    | P for heterogeneity | Total                 |
|--------------------------------------|--------------------|----------------------|--------------------|---------------------|-----------------------|
|                                      | BCS + RT           | BCS - RT             | Mastectomy         |                     |                       |
| <b>Year of DCIS diagnosis</b>        |                    |                      |                    |                     |                       |
| 2000-04                              | 531 (10.8)         | 2734 (55.6)          | 1651 (33.6)        | <0.001              | 4916 (100.0)          |
| 2005-09                              | 1132 (13.2)        | 4631 (54.0)          | 2805 (32.7)        |                     | 8568 (100.0)          |
| 2010-14                              | 3136 (27.8)        | 5076 (44.9)          | 3083 (27.3)        |                     | 11,295 (100.0)        |
| <b>Age at DCIS diagnosis (years)</b> |                    |                      |                    |                     |                       |
| <55                                  | 1422 (18.5)        | 3755 (48.9)          | 2496 (32.5)        | <0.001              | 7673 (100.0)          |
| 55-59                                | 1010 (19.9)        | 2488 (48.9)          | 1590 (31.2)        |                     | 5088 (100.0)          |
| 60-64                                | 1054 (19.3)        | 2802 (51.4)          | 1592 (29.2)        |                     | 5448 (100.0)          |
| 65+                                  | 1312 (20.0)        | 3396 (51.7)          | 1860 (28.3)        |                     | 6568 (100.0)          |
| <b>Region</b>                        |                    |                      |                    |                     |                       |
| Eastern                              | 1266 (37.0)        | 1227 (35.9)          | 926 (27.1)         | <0.001              | 3419 (100.0)          |
| North West                           | 361 (13.6)         | 1406 (52.9)          | 893 (33.6)         |                     | 2660 (100.0)          |
| Northern/Yorkshire                   | 1510 (39.3)        | 1026 (26.7)          | 1310 (34.1)        |                     | 3846 (100.0)          |
| Oxford                               | 157 (10.4)         | 937 (62.2)           | 413 (27.4)         |                     | 1507 (100.0)          |
| South West                           | 198 (4.9)          | 2699 (66.6)          | 1156 (28.5)        |                     | 4053 (100.0)          |
| Thames                               | 531 (11.2)         | 2792 (59.0)          | 1406 (29.7)        |                     | 4729 (100.0)          |
| Trent                                | 395 (19.4)         | 942 (46.2)           | 702 (34.4)         |                     | 2039 (100.0)          |
| West Midlands                        | 382 (15.1)         | 1411 (55.9)          | 731 (29.0)         |                     | 2524 (100.0)          |
| <b>DCIS size (mm)</b>                |                    |                      |                    |                     |                       |
| <=10                                 | 1416 (17.5)        | 5950 (73.4)          | 738 (9.1)          | <0.001              | 8104 (100.0)          |
| 11-20                                | 1939 (26.7)        | 3837 (52.7)          | 1498 (20.6)        |                     | 7274 (100.0)          |
| 21-50                                | 1383 (18.6)        | 2470 (33.1)          | 3599 (48.3)        |                     | 7452 (100.0)          |
| 51+                                  | 65 (3.3)           | 185 (9.5)            | 1704 (87.2)        |                     | 1954 (100.0)          |
| <b>DCIS grade</b>                    |                    |                      |                    |                     |                       |
| Low/intermediate                     | 1202 (12.2)        | 6647 (67.5)          | 2003 (20.3)        | <0.001              | 9852 (100.0)          |
| High                                 | 3599 (24.1)        | 5795 (38.8)          | 5534 (37.1)        |                     | 14,928 (100.0)        |
| <b>Oestrogen-receptor status</b>     |                    |                      |                    |                     |                       |
| Positive                             | 3579 (19.3)        | 9948 (53.7)          | 5000 (27.0)        | <0.001              | 18,527 (100.0)        |
| Negative                             | 1221 (19.5)        | 2491 (39.9)          | 2535 (40.6)        |                     | 6247 (100.0)          |
| <b>Laterality of DCIS</b>            |                    |                      |                    |                     |                       |
| Left                                 | 2510 (19.7)        | 6414 (50.2)          | 3842 (30.1)        | 0.36                | 12,766 (100.0)        |
| Right                                | 2290 (19.1)        | 6028 (50.2)          | 3695 (30.8)        |                     | 12,013 (100.0)        |
| <b>Final margin distance (mm)</b>    |                    |                      |                    |                     |                       |
| 5+                                   | 2184 (22.6)        | 4080 (42.2)          | 3408 (35.2)        |                     | 9672 (100.0)          |
| 3-4                                  | 684 (26.0)         | 1484 (56.3)          | 466 (17.7)         |                     | 2634 (100.0)          |
| 1-2                                  | 855 (23.0)         | 2094 (56.2)          | 775 (20.8)         |                     | 3724 (100.0)          |
| Involved                             | 99 (17.7)          | 280 (50.2)           | 179 (32.1)         |                     | 558 (100.0)           |
| Before 2007                          | 977 (11.9)         | 4505 (55.0)          | 2705 (33.0)        |                     | 8187 (100.0)          |
| <b>Duration of follow-up (years)</b> |                    |                      |                    |                     |                       |
| 0-4                                  | 3176 (27.2)        | 5285 (45.3)          | 3205 (27.5)        |                     | 11,666 (100.0)        |
| 5-9                                  | 1129 (13.2)        | 4619 (54.0)          | 2803 (32.8)        |                     | 8551 (100.0)          |
| 10-14                                | 494 (10.8)         | 2538 (55.6)          | 1530 (33.5)        |                     | 4562 (100.0)          |
| <b>Laterality of IBC</b>             |                    |                      |                    |                     |                       |
| Ipsilateral                          | 66 (11.7)          | 398 (70.6)           | 100 (17.7)         |                     | 564 (100.0)           |
| Contralateral                        | 75 (15.2)          | 238 (48.3)           | 180 (36.5)         |                     | 493 (100.0)           |
| Unknown                              | 7 (11.1)           | 26 (41.3)            | 30 (47.6)          |                     | 63 (100.0)            |
| <b>Vital status on 31 Dec 2014</b>   |                    |                      |                    |                     |                       |
| Alive                                | 4673 (19.6)        | 11,897 (50.0)        | 7216 (30.3)        |                     | 23,786 (100.0)        |
| Emigrated                            | 6 (10.5)           | 32 (56.1)            | 19 (33.3)          |                     | 57 (100.0)            |
| Dead                                 | 120 (12.8)         | 512 (54.8)           | 303 (32.4)         |                     | 935 (100.0)           |
| <b>Cause of death</b>                |                    |                      |                    |                     |                       |
| Breast cancer                        | 15                 | 49                   | 43                 |                     | 107                   |
| Other causes                         | 105                | 457                  | 249                |                     | 811                   |
| Unknown cause                        | -                  | 7                    | 10                 |                     | 17                    |
| <b>Total</b>                         | <b>4799 (19.4)</b> | <b>12,441 (50.2)</b> | <b>7539 (30.4)</b> |                     | <b>24,779 (100.0)</b> |

BCS+RT: breast-conserving surgery, radiotherapy recorded  
BCS-RT: breast-conserving surgery, radiotherapy not recorded

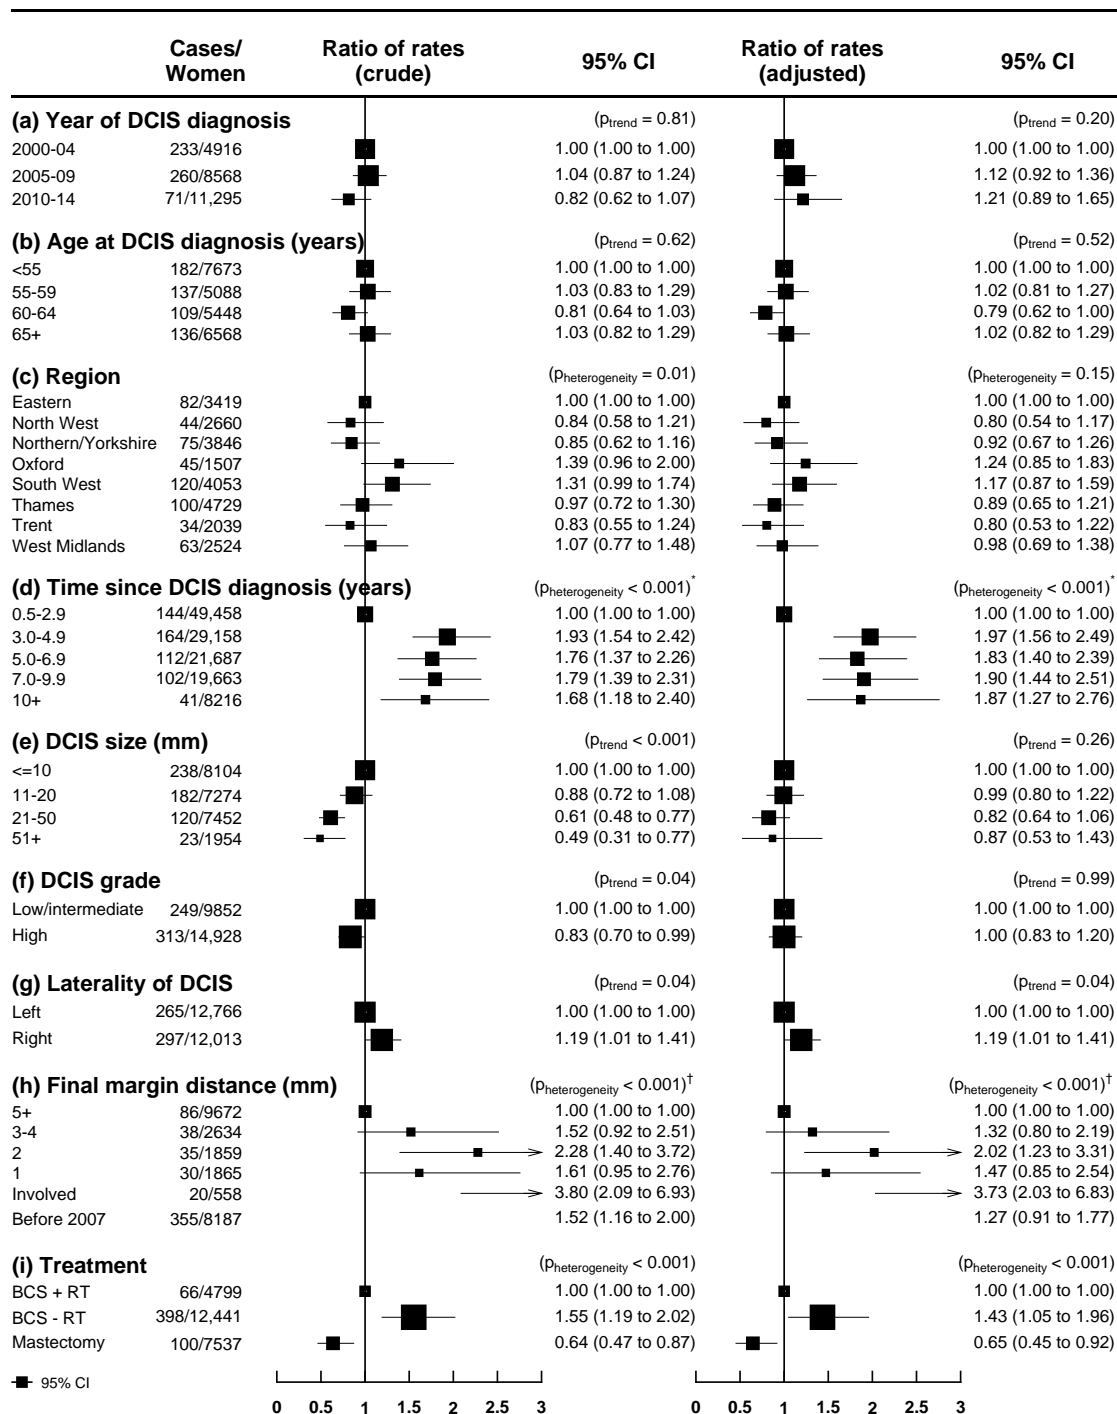

BCS+RT: breast-conserving surgery, radiotherapy recorded  
 BCS-RT: breast-conserving surgery, radiotherapy not recorded  
 CI: confidence interval  
 P: results of tests for heterogeneity or trend  
 \* Tests for trend excluding years 0.5-2.9: crude  $P=0.40$ ; adjusted  $P=0.87$   
 † Tests for trend across clear margin categories: crude  $P=0.004$ ; adjusted  $P=0.02$

**Supplementary Figure S1. Incidence of ipsilateral invasive breast cancer according to various factors in 24,779 women diagnosed with unilateral DCIS as a result of screening between April 2000 and March 2014 and who received surgery showing final margin distances of 1 and 2 mm separately.** Women recorded with oestrogen-receptor positive DCIS and receiving endocrine therapy are excluded. For each factor rates are shown relative to first category and adjustment is for all other factors except final margin distance. Final margin distance was not included in the adjustment as information on this variable was available only from 2007 onwards.

### Breast-conserving surgery with radiotherapy

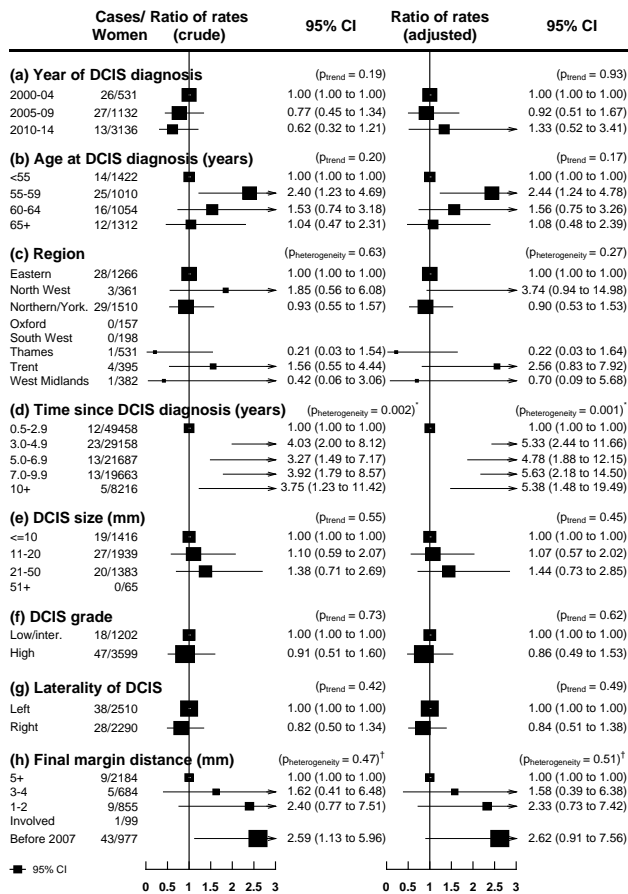

\* Tests for trend excluding years 0.5-2.9: crude P=0.90; adjusted P=0.97  
 † Tests for trend across clear margin categories: crude P=0.13; adjusted P=0.13

### Breast-conserving surgery no radiotherapy

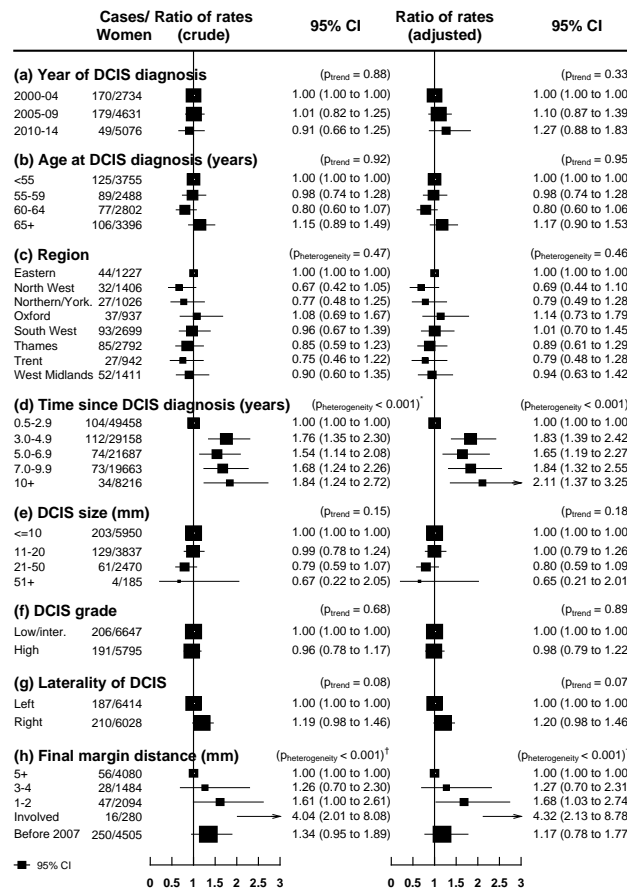

\* Tests for trend excluding years 0.5-2.9: crude P=0.98; adjusted P=0.61  
 † Tests for trend across clear margin categories: crude P=0.05; adjusted P=0.05

### Mastectomy

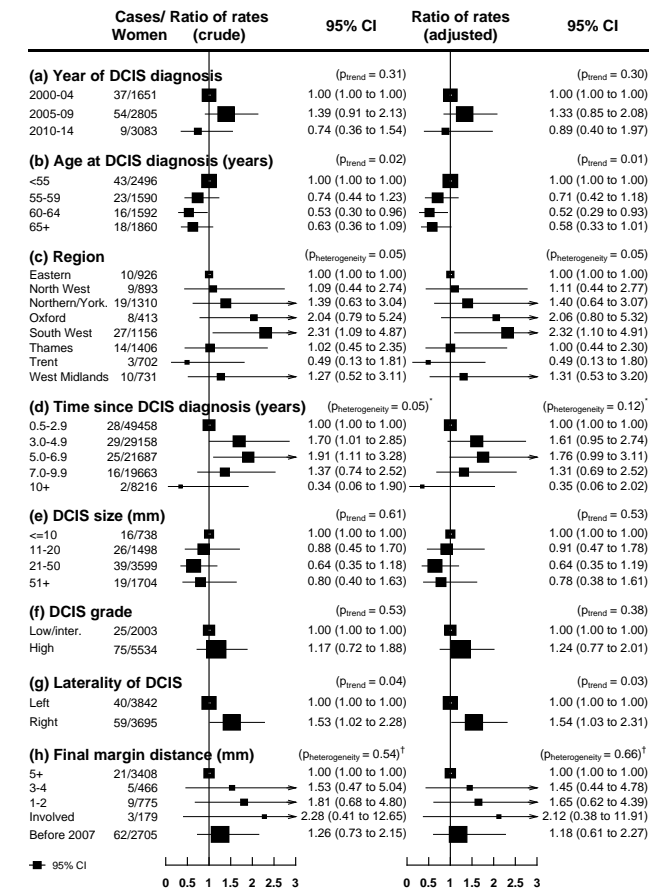

\* Tests for trend excluding years 0.5-2.9: crude P=0.06; adjusted P=0.19  
 † Tests for trend across clear margin categories: crude P=0.20; adjusted P=0.31

**Supplementary Figure S2. Incidence of ipsilateral invasive breast cancer according to various factors in 24,779 women diagnosed with unilateral DCIS detected as a result of screening between April 2000 and March 2014 and who received surgery.** Women with oestrogen-receptor positive DCIS and recorded as receiving endocrine therapy are excluded. For each factor rates are shown relative to first category and adjustment is for all other factors except final margin distance. Final margin distance was not included in the adjustment as information on this variable was available only from 2007 onwards.

### Breast-conserving surgery with radiotherapy

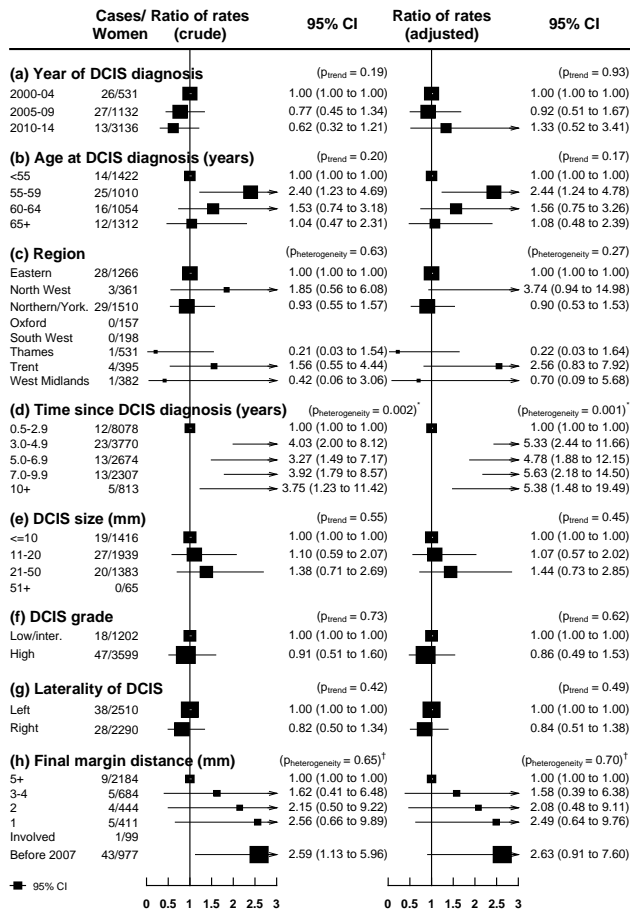

\* Tests for trend excluding years 0.5-2.9: crude P=0.90; adjusted P=0.97  
 † Tests for trend across clear margin categories: crude P=0.12; adjusted P=0.12

### Breast-conserving surgery no radiotherapy

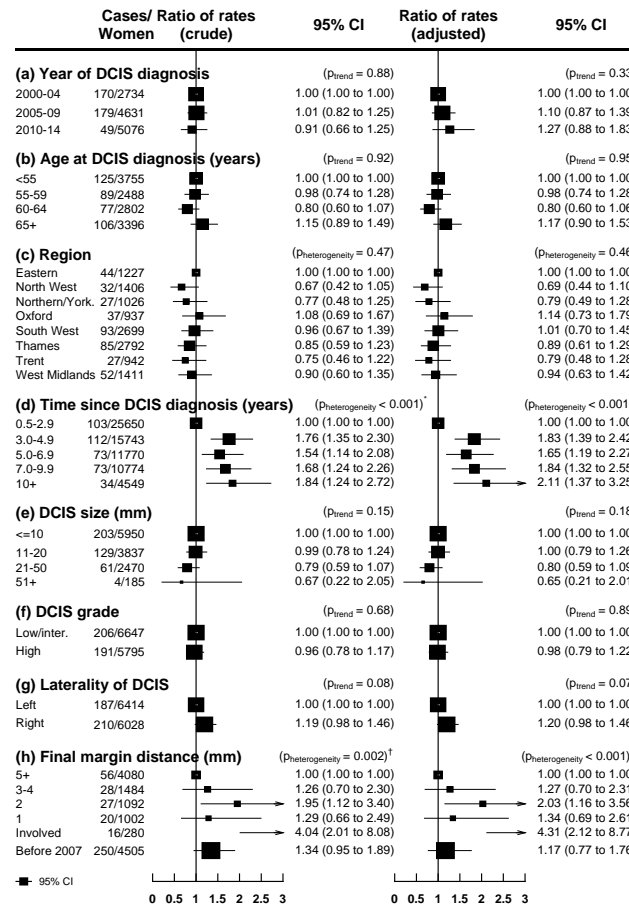

\* Tests for trend excluding years 0.5-2.9: crude P=0.98; adjusted P=0.61  
 † Tests for trend across clear margin categories: crude P=0.11; adjusted P=0.10

### Mastectomy

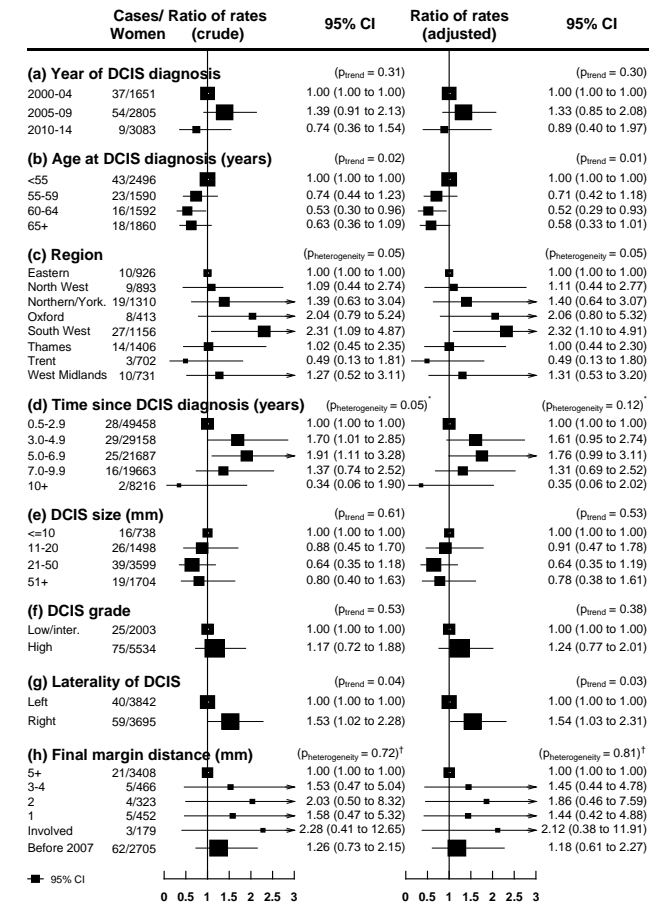

\* Tests for trend excluding years 0.5-2.9: crude P=0.06; adjusted P=0.19  
 † Tests for trend across clear margin categories: crude P=0.24; adjusted P=0.37

**Supplementary Figure S3. Incidence of ipsilateral invasive breast cancer according to various factors in 24,779 women diagnosed with unilateral DCIS detected as a result of screening between April 2000 and March 2014 and who received surgery showing final margin distances of 1 and 2 mm separately.** Women with oestrogen-receptor positive DCIS and recorded as receiving endocrine therapy are excluded. For each factor rates are shown relative to first category and adjustment is for all other factors except final margin distance. Final margin distance was not included in the adjustment as information on this variable was available only from 2007 onwards.



**Supplementary Table S14. Tests for interactions between pairs of factors for analysis shown in Figure 3.**

| <b>Factors</b>                               | <b>P-value</b> |
|----------------------------------------------|----------------|
| Treatment x age at diagnosis                 | 0.02           |
| Treatment x year of diagnosis                | 0.36           |
| Treatment x time since diagnosis             | 0.16           |
| Treatment x DCIS grade                       | 0.72           |
| Treatment x tumour size                      | 0.46           |
| Treatment x laterality                       | 0.15           |
| DCIS grade x age at diagnosis                | 0.18           |
| DCIS grade x year of diagnosis               | 0.19           |
| DCIS grade x time since diagnosis            | 0.01           |
| DCIS grade x tumour size                     | 0.90           |
| DCIS grade x laterality                      | 0.46           |
| Tumour size x age at diagnosis               | 0.47           |
| Tumour size x year of diagnosis              | 0.82           |
| Tumour size x time since diagnosis           | 0.26           |
| Tumour size x laterality                     | 0.26           |
| Age at diagnosis x year of diagnosis         | 0.39           |
| Age at diagnosis x time since diagnosis      | 0.58           |
| Age at diagnosis x laterality                | 0.20           |
| Year of diagnosis x time since diagnosis     | 0.77           |
| Year of diagnosis x laterality               | 0.07           |
| Time since diagnosis x laterality            | 0.70           |
| *Final margin distance x treatment           | 0.98           |
| Final margin distance x DCIS grade           | 0.43           |
| Final margin distance x age at diagnosis     | 0.85           |
| Final margin distance x year of diagnosis    | 0.59           |
| Final margin distance x time since diagnosis | 0.54           |
| Final margin distance x tumour size          | 0.80           |
| Final margin distance x laterality           | 0.50           |

\* Women diagnosed before 2007 were excluded for testing interaction between final marginal distance and other factors.

Factors are treated as categorical variables with categories as shown in Figure 3, apart from tumour size and final margin distance which are treated as continuous variables in this table. Adjustments are as in Figure 3 except for analyses including interactions with final margin distance, in which final margin distance is included as a main effect as well as an interaction.

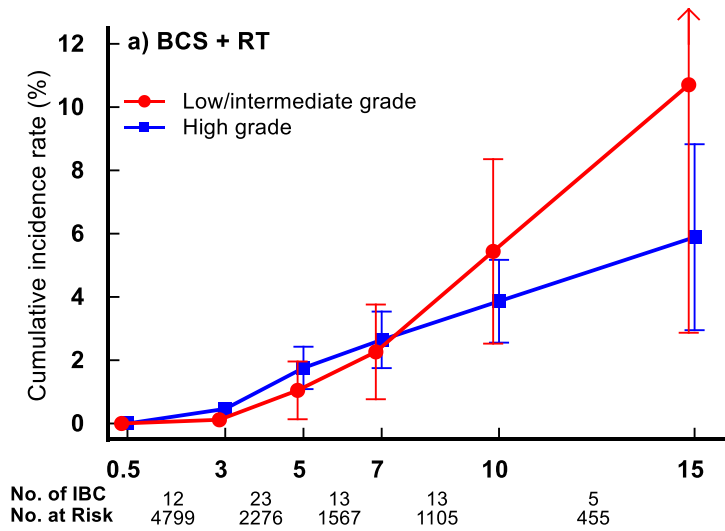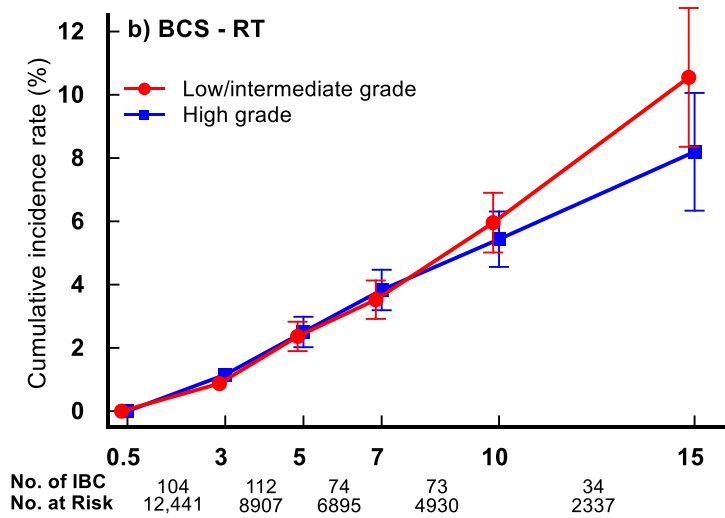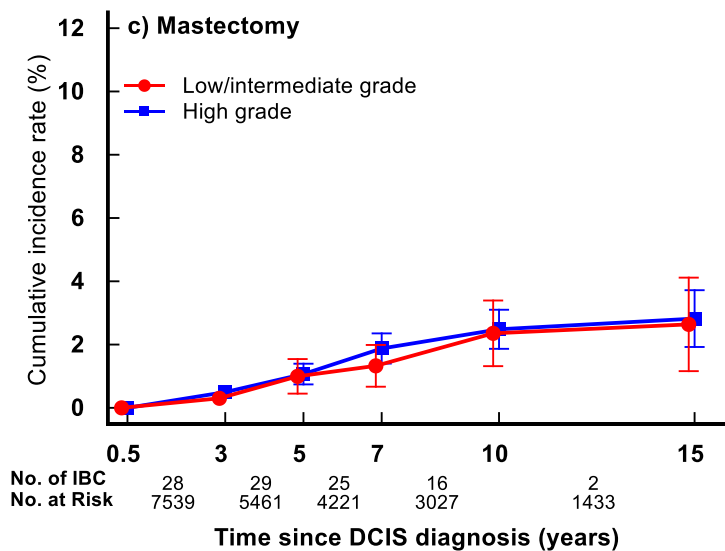

BCS+RT: breast-conserving surgery, radiotherapy recorded  
 BCS-RT: breast-conserving surgery, radiotherapy not recorded  
 No. of IBC: Number of ipsilateral invasive breast cancers during interval  
 No. at Risk: Number of individuals at risk of invasive breast cancer at start of interval

**Supplementary Figure S4. Cumulative incidence rate of ipsilateral invasive breast cancer in 24,779 women diagnosed with unilateral DCIS detected as a result of screening between April 2000 and March 2014 by treatment and DCIS grade. Women with no surgery and women with oestrogen-receptor positive DCIS and recorded as receiving endocrine therapy were excluded.**

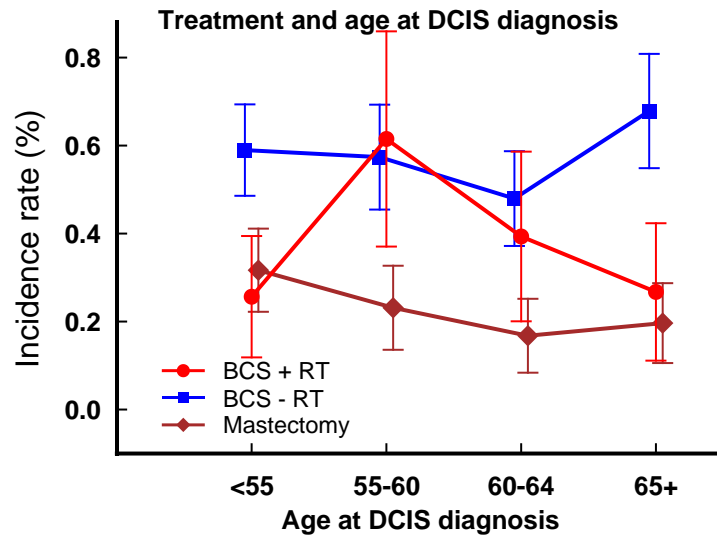

BCS+RT: breast-conserving surgery, radiotherapy recorded  
 BCS-RT: breast-conserving surgery, radiotherapy not recorded

**Supplementary Figure S5. Annual incidence rate of ipsilateral invasive breast cancer in 24,779 women diagnosed with unilateral DCIS detected as a result of screening between April 2000 and March 2014 and who received surgery by treatment and age at diagnosis of DCIS. Women with oestrogen-receptor positive DCIS and recorded as receiving endocrine therapy are excluded.**

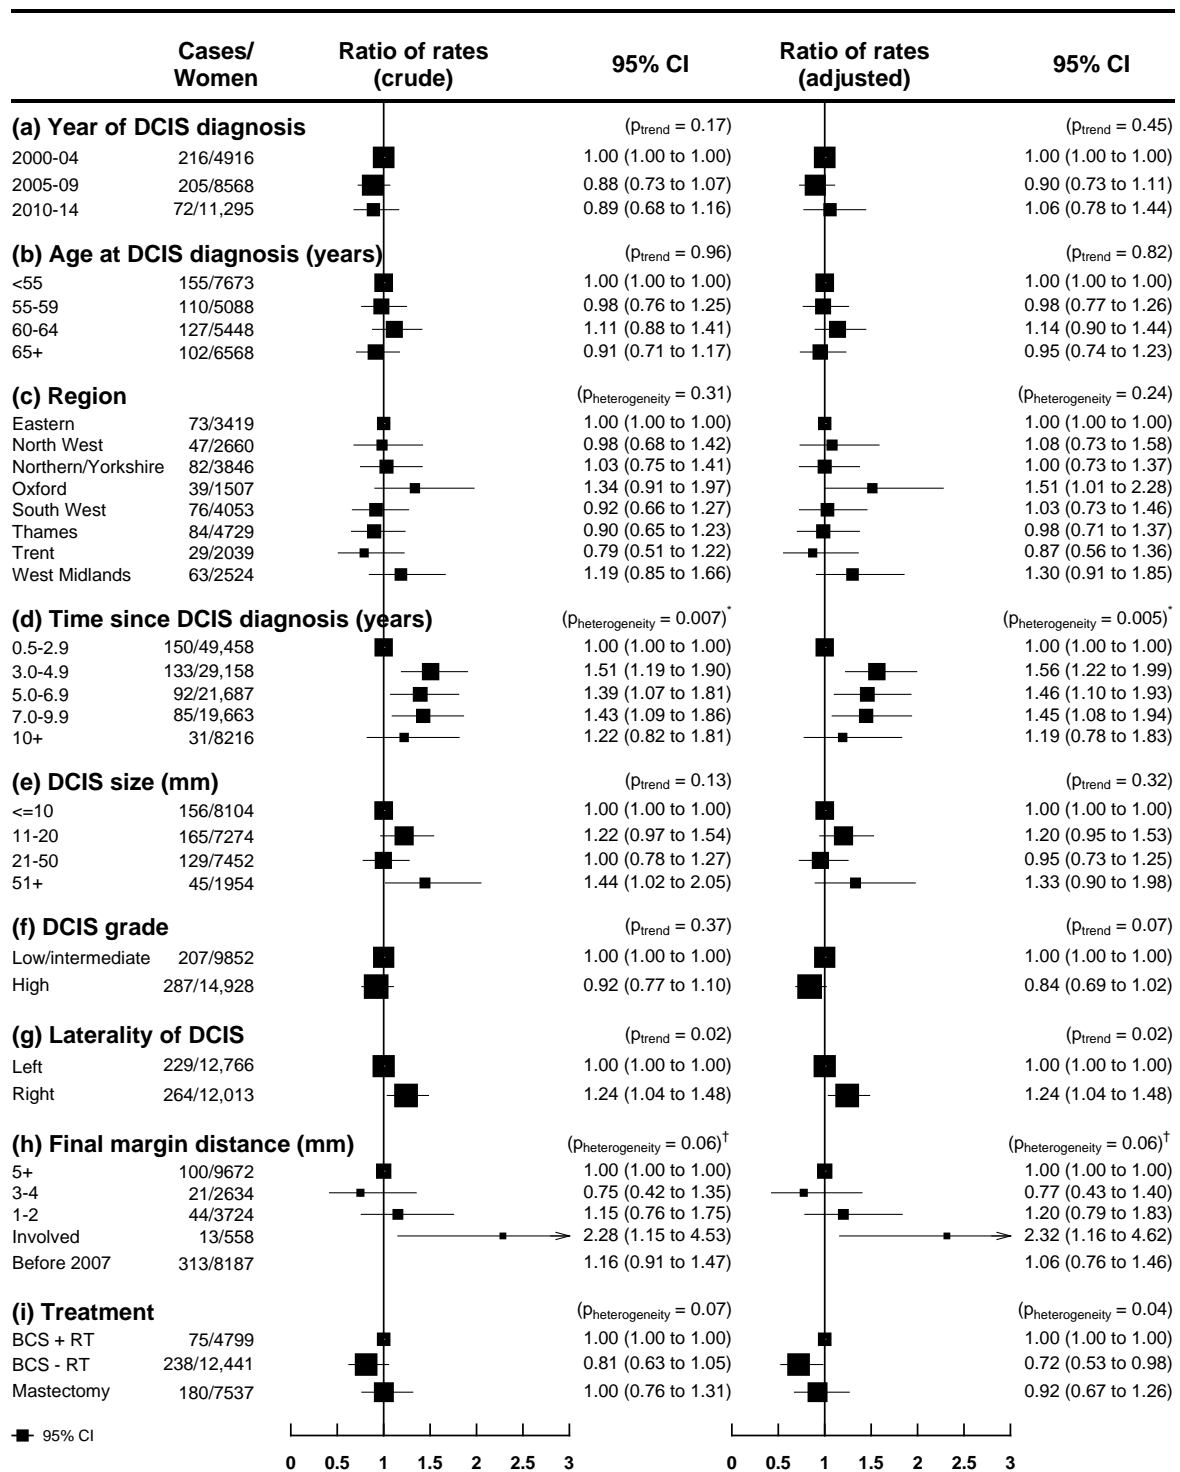

BCS+RT: breast-conserving surgery, radiotherapy recorded  
 BCS-RT: breast-conserving surgery, radiotherapy not recorded  
 CI: confidence interval

P: results of tests for heterogeneity or trend

\* Tests for trend excluding years 0.5-2.9: crude  $P=0.36$ ; adjusted  $P=0.36$

† Tests for trend across clear margin categories: crude  $P=0.66$ ; adjusted  $P=0.53$

**Supplementary Figure S6. Incidence rate of contralateral invasive breast cancer according to various factors in 24,779 women diagnosed with unilateral DCIS detected as a result of screening between April 2000 and March 2014 and who received surgery.** Women with oestrogen-receptor positive DCIS and recorded as receiving endocrine therapy are excluded. For each factor, rates are shown relative to the first category and adjustment is for all other factors except final margin distance. Final margin distance was not included in the adjustment as information on this variable was available only from 2007 onwards.

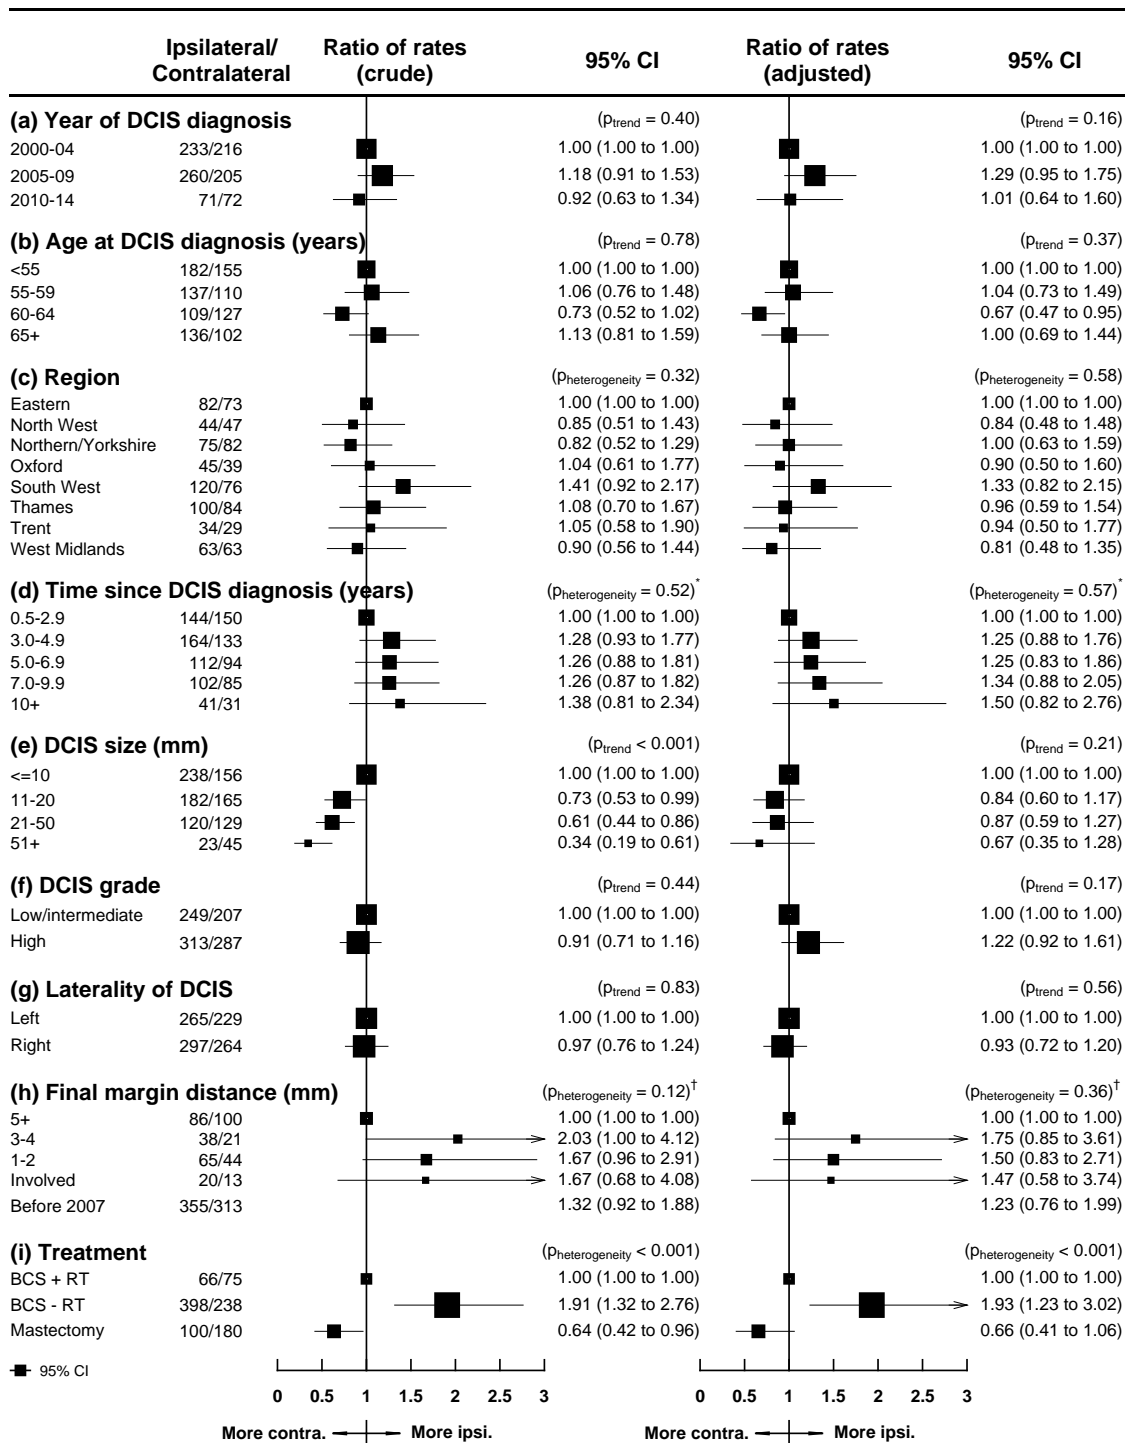

BCS+RT: breast-conserving surgery, radiotherapy recorded  
 BCS-RT: breast-conserving surgery, radiotherapy not recorded  
 CI: confidence interval  
 P: results of tests for heterogeneity or trend  
 \* Tests for trend excluding years 0.5-2.9; crude  $P=0.16$ ; adjusted  $P=0.12$   
 † Tests for trend across clear margin categories: crude  $P=0.05$ ; adjusted  $P=0.15$

**Supplementary Figure S7. Comparison of the rates of ipsilateral and contralateral invasive breast cancer according to various factors in 24,779 women with unilateral screen-detected DCIS detected as a result of screening between April 2000 and March 2014 and who received surgery.** Women recorded with oestrogen-receptor positive DCIS and receiving endocrine therapy are excluded. For each factor rates are shown relative to first category and adjustment is for all other factors except final margin distance. Final margin distance was not included in the adjustment as information on this variable was available only from 2007 onwards.

**Supplementary Table S15. Characteristics of 29,044 women diagnosed with unilateral DCIS detected as a result of screening between April 2000 and March 2014 and who received surgery, according to oestrogen-receptor status and whether or not they were recorded as having received endocrine therapy.**

|                                      | Oestrogen-receptor negative |                    | Oestrogen-receptor negative | P for heterogeneity | Total                |
|--------------------------------------|-----------------------------|--------------------|-----------------------------|---------------------|----------------------|
|                                      | No endocrine therapy        | Endocrine therapy  |                             |                     |                      |
| <b>Year of DCIS diagnosis</b>        |                             |                    |                             |                     |                      |
| 2000-04                              | 3240 (51.7)                 | 1355 (21.6)        | 1676 (26.7)                 | <0.001              | 6271 (100.0)         |
| 2005-09                              | 6229 (59.8)                 | 1856 (17.8)        | 2339 (22.4)                 |                     | 10,424 (100.0)       |
| 2010-14                              | 9073 (73.5)                 | 1054 (8.5)         | 2222 (18.0)                 |                     | 12,349 (100.0)       |
| <b>Age at DCIS diagnosis (years)</b> |                             |                    |                             |                     |                      |
| <55                                  | 6296 (69.8)                 | 1344 (14.9)        | 1377 (15.3)                 | <0.001              | 9017 (100.0)         |
| 55-59                                | 3621 (59.9)                 | 961 (15.9)         | 1467 (24.3)                 |                     | 6049 (100.0)         |
| 60-64                                | 3818 (59.5)                 | 970 (15.1)         | 1630 (25.4)                 |                     | 6418 (100.0)         |
| 65+                                  | 4798 (63.5)                 | 992 (13.1)         | 1770 (23.4)                 |                     | 7560 (100.0)         |
| <b>Region</b>                        |                             |                    |                             |                     |                      |
| Eastern                              | 2595 (70.9)                 | 241 (6.6)          | 824 (22.5)                  | <0.001              | 3660 (100.0)         |
| North West                           | 1961 (53.3)                 | 1018 (27.7)        | 699 (19.0)                  |                     | 3678 (100.0)         |
| Northern/Yorkshire                   | 2798 (64.1)                 | 521 (11.9)         | 1048 (24.0)                 |                     | 4367 (100.0)         |
| Oxford                               | 1092 (65.7)                 | 156 (9.4)          | 415 (25.0)                  |                     | 1663 (100.0)         |
| South West                           | 3104 (66.0)                 | 652 (13.9)         | 949 (20.2)                  |                     | 4705 (100.0)         |
| Thames                               | 3563 (62.7)                 | 950 (16.7)         | 1166 (20.5)                 |                     | 5679 (100.0)         |
| Trent                                | 1519 (61.3)                 | 440 (17.7)         | 520 (21.0)                  |                     | 2479 (100.0)         |
| West Midlands                        | 1917 (68.1)                 | 289 (10.3)         | 607 (21.6)                  |                     | 2813 (100.0)         |
| <b>DCIS size (mm)</b>                |                             |                    |                             |                     |                      |
| <=10                                 | 6739 (70.7)                 | 1425 (15.0)        | 1365 (14.3)                 | <0.001              | 9529 (100.0)         |
| 11-20                                | 5335 (61.6)                 | 1383 (16.0)        | 1939 (22.4)                 |                     | 8657 (100.0)         |
| 21-50                                | 5141 (59.5)                 | 1189 (13.8)        | 2311 (26.7)                 |                     | 8641 (100.0)         |
| 51+                                  | 1333 (60.2)                 | 262 (11.8)         | 621 (28.0)                  |                     | 2216 (100.0)         |
| <b>DCIS grade</b>                    |                             |                    |                             |                     |                      |
| Low/intermediate                     | 8925 (76.1)                 | 1882 (16.0)        | 927 (7.9)                   | <0.001              | 11,734 (100.0)       |
| High                                 | 9609 (55.5)                 | 2384 (13.8)        | 5319 (30.7)                 |                     | 17,312 (100.0)       |
| <b>Laterality of DCIS</b>            |                             |                    |                             |                     |                      |
| Left                                 | 9537 (63.6)                 | 2222 (14.8)        | 3229 (21.5)                 | 0.75                | 14,988 (100.0)       |
| Right                                | 8993 (64.0)                 | 2043 (14.5)        | 3020 (21.5)                 |                     | 14,056 (100.0)       |
| <b>Final margin distance (mm)</b>    |                             |                    |                             |                     |                      |
| 5+                                   | 7481 (69.3)                 | 1126 (10.4)        | 2191 (20.3)                 | <0.001              | 10798 (100.0)        |
| 3-4                                  | 2090 (69.7)                 | 363 (12.1)         | 544 (18.2)                  |                     | 2997 (100.0)         |
| 1-2                                  | 2932 (67.9)                 | 598 (13.8)         | 790 (18.3)                  |                     | 4320 (100.0)         |
| Involved                             | 437 (68.6)                  | 79 (12.4)          | 121 (19.0)                  |                     | 637 (100.0)          |
| Before 2007                          | 5602 (54.4)                 | 2105 (20.5)        | 2585 (25.1)                 |                     | 10,292 (100.0)       |
| <b>Surgery and radiotherapy</b>      |                             |                    |                             |                     |                      |
| BCS + RT                             | 3579 (66.7)                 | 569 (10.6)         | 1220 (22.7)                 |                     | 5368 (100.0)         |
| BCS - RT                             | 9948 (65.5)                 | 2747 (18.1)        | 2493 (16.4)                 |                     | 15,188 (100.0)       |
| Mastectomy                           | 5000 (58.9)                 | 951 (11.2)         | 2537 (29.9)                 |                     | 8488 (100.0)         |
| <b>Duration of follow-up (years)</b> |                             |                    |                             |                     |                      |
| 0-4                                  | 9327 (72.8)                 | 1142 (8.9)         | 2339 (18.3)                 |                     | 12808 (100.0)        |
| 5-9                                  | 6191 (59.4)                 | 1877 (18.0)        | 2360 (22.6)                 |                     | 10428 (100.0)        |
| 11-14                                | 3020 (52.0)                 | 1246 (21.5)        | 1542 (26.5)                 |                     | 5808 (100.0)         |
| <b>Laterality of IBC</b>             |                             |                    |                             |                     |                      |
| Ipsilateral                          | 398 (61.6)                  | 82 (12.7)          | 166 (25.7)                  |                     | 646 (100.0)          |
| Contralateral                        | 337 (57.4)                  | 94 (16.0)          | 156 (26.6)                  |                     | 587 (100.0)          |
| Unknown                              | 41 (49.4)                   | 20 (24.1)          | 22 (26.5)                   |                     | 83 (100.0)           |
| <b>Vital status on 31 Dec 2014</b>   |                             |                    |                             |                     |                      |
| Alive                                | 17,856 (64.2)               | 4009 (14.4)        | 5930 (21.3)                 |                     | 27,795 (100.0)       |
| Emigrated                            | 41 (55.4)                   | 17 (23.0)          | 16 (21.6)                   |                     | 74 (100.0)           |
| Dead                                 | 629 (53.5)                  | 240 (20.4)         | 306 (26.0)                  |                     | 1175 (100.0)         |
| <b>Cause of death</b>                |                             |                    |                             |                     |                      |
| Breast cancer                        | 65 (47.8)                   | 29 (21.3)          | 42 (30.9)                   |                     | 136 (100.0)          |
| Other causes                         | 552 (54.1)                  | 210 (20.6)         | 259 (25.4)                  |                     | 1021 (100.0)         |
| Unknown cause                        | 12 (66.7)                   | 1 (5.6)            | 5 (27.8)                    |                     | 18 (100.0)           |
| <b>Total</b>                         | <b>18,542 (63.8)</b>        | <b>4265 (14.7)</b> | <b>6237 (21.5)</b>          |                     | <b>29,044(100.0)</b> |

BCS+RT: breast-conserving surgery, radiotherapy recorded  
 BCS-RT: breast-conserving surgery, radiotherapy not recorded

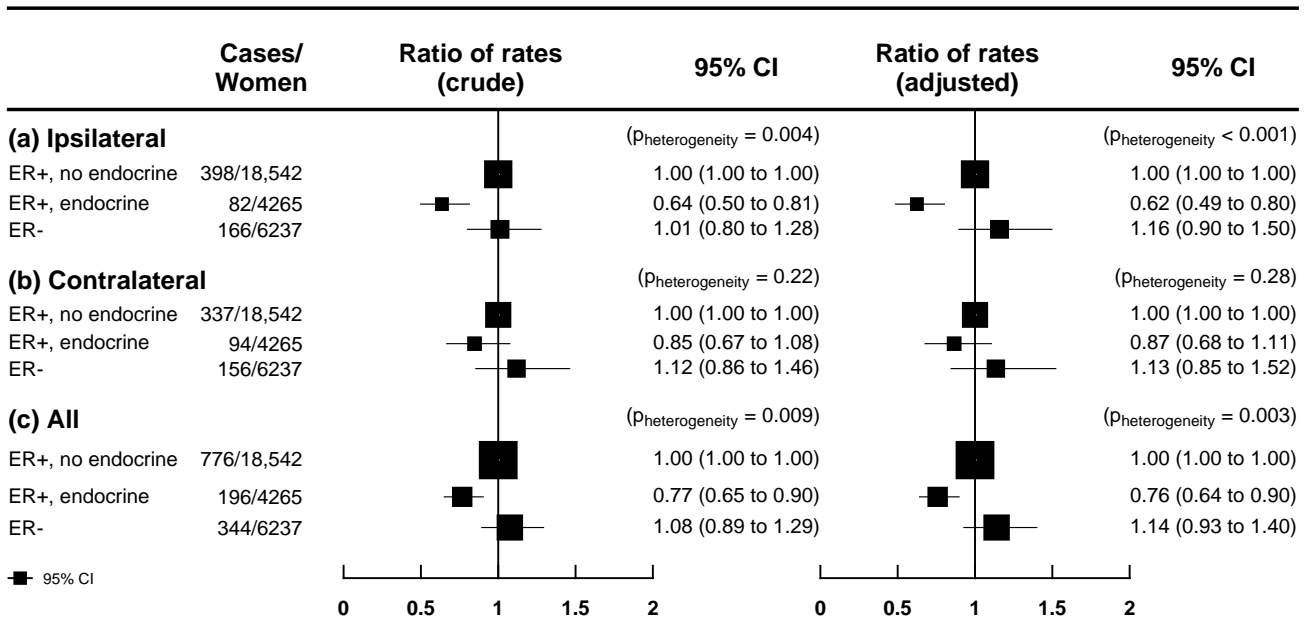

ER+, no endocrine: oestrogen-receptor positive DCIS, endocrine therapy not recorded  
ER+, endocrine: oestrogen-receptor positive DCIS, endocrine therapy recorded  
ER-: oestrogen-receptor negative DCIS  
CI: confidence interval  
P: results of tests for heterogeneity

**Supplementary Figure S8. Incidence of ipsilateral and contralateral invasive breast cancer in 29,044 women with unilateral screen-detected DCIS according to oestrogen-receptor status and endocrine therapy.** Rates are shown relative to first category in each section. Adjustment is for year of diagnosis, age at diagnosis, time since diagnosis, tumour size, DCIS grade, laterality and category of surgery/radiotherapy.

## Breast-conserving surgery with radiotherapy

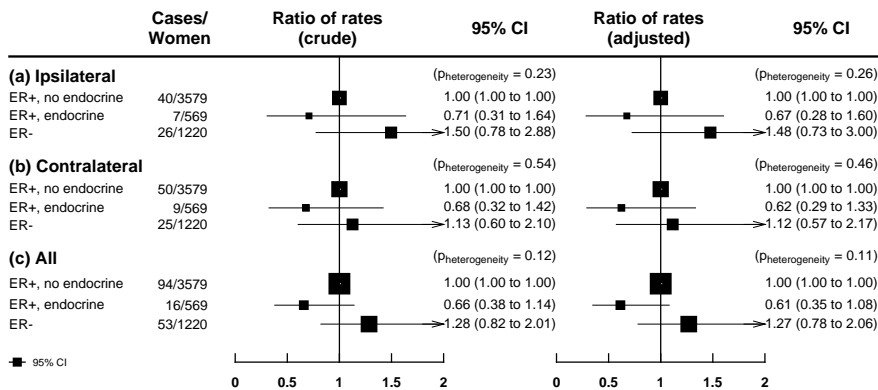

## Breast-conserving surgery no radiotherapy

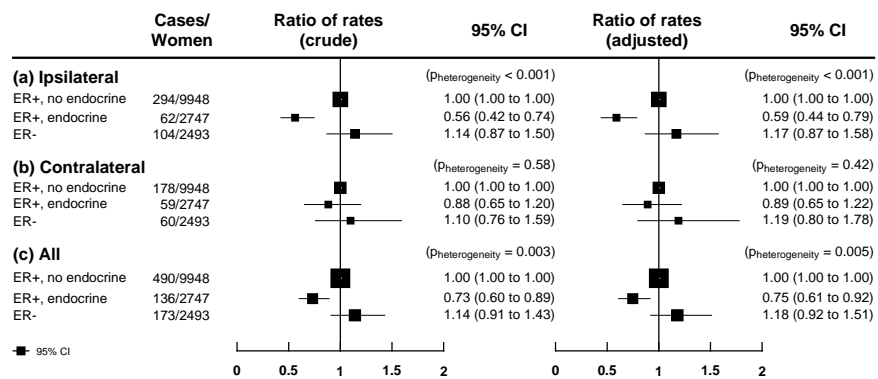

## Mastectomy

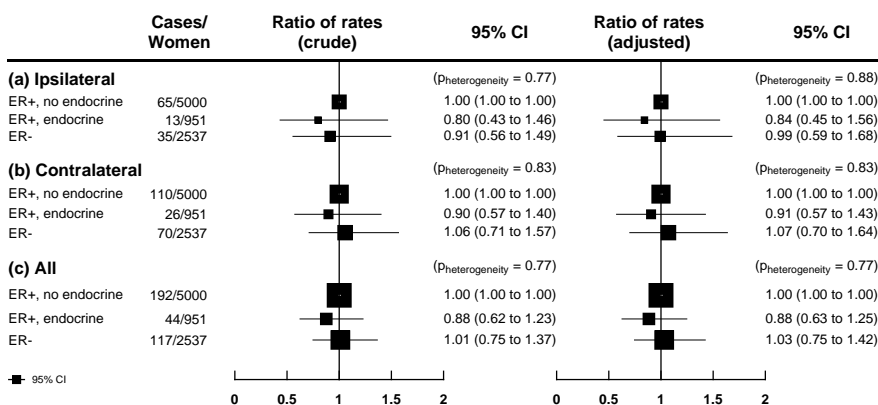

ER+, no endocrine: oestrogen-receptor positive DCIS, endocrine therapy not recorded

ER+, endocrine: oestrogen-receptor positive DCIS, endocrine therapy recorded

ER-: oestrogen-receptor negative DCIS

CI: confidence interval

P: results of tests for heterogeneity

**Supplementary Figure S9. Incidence of ipsilateral and contralateral invasive breast cancer in 29,044 women with unilateral screen-detected DCIS who underwent surgery according to oestrogen-receptor status, endocrine therapy, and whether they received mastectomy, breast conserving surgery with radiotherapy, or breast conserving surgery without radiotherapy. Rates are shown relative to first category in each section. Adjustment is for year of diagnosis, age at diagnosis, time since diagnosis, tumour size, and DCIS grade and laterality.**
